# Supplementary material for: Selenoxide Elimination Triggers Enamine Hydrolysis to Primary and Secondary Amines: A Combined Experimental and Theoretical Investigation
Source: MDPI journal article supplement (doi:10.3390/molecules26092770), 2021-05-08
Supplement: s1 [file s1]

# Supplementary Materials

## Insights on Enamine Hydrolysis Triggered by Selenoxide Elimination Producing Primary and Secondary Amines

Giovanni Ribaudo<sup>1</sup>, Marco Bortoli<sup>2,3</sup>, Erika Oselladore<sup>1</sup>, Alberto Ongaro<sup>1</sup>, Alessandra Gianoncelli<sup>1</sup>,  
Giuseppe Zagotto<sup>4</sup> and Laura Orian<sup>2\*</sup>

<sup>1</sup> *Dipartimento di Medicina Molecolare e Traslazionale, Università degli Studi di Brescia, Viale Europa 11,  
25123 Brescia - Italy*

<sup>2</sup> *Dipartimento di Scienze Chimiche, Università degli Studi di Padova, Via Marzolo 1, 35131 Padova - Italy*

<sup>3</sup> *Institut de Química Computacional i Catàlisi and Departament de Química, Universitat de Girona, C/M.A.  
Capmany 69, 17003 Girona, Spain*

<sup>4</sup> *Dipartimento di Scienze del Farmaco, Università degli Studi di Padova, Via Marzolo 5, 35131 Padova - Italy*

\*Corresponding author: Prof. Laura Orian, Dipartimento di Scienze Chimiche, Università degli Studi di  
Padova, Via Marzolo 1, 35131 Padova - Italy. E-mail: laura.orian@unipd.it.

## Table of contents

|                                                                                                                                                 |            |
|-------------------------------------------------------------------------------------------------------------------------------------------------|------------|
| <b>NMR and ESI-MS characterization of compounds 1-9</b>                                                                                         | <b>S1</b>  |
| <i>Compound 1</i>                                                                                                                               | <i>S1</i>  |
| <i>Compound 2</i>                                                                                                                               | <i>S2</i>  |
| <i>Compound 3</i>                                                                                                                               | <i>S4</i>  |
| <i>Compound 4</i>                                                                                                                               | <i>S5</i>  |
| <i>Compound 5</i>                                                                                                                               | <i>S7</i>  |
| <i>Compound 6</i>                                                                                                                               | <i>S8</i>  |
| <i>Compound 7</i>                                                                                                                               | <i>S10</i> |
| <i>Compound 8</i>                                                                                                                               | <i>S11</i> |
| <i>Compound 9</i>                                                                                                                               | <i>S13</i> |
| <b>Representative <sup>1</sup>H-NMR and ESI-MS spectra of the oxidation study with H<sub>2</sub>O<sub>2</sub></b>                               | <b>S14</b> |
| <i>Compound 3</i>                                                                                                                               | <i>S14</i> |
| <i>Compound 1</i>                                                                                                                               | <i>S16</i> |
| <i>Compound 5</i>                                                                                                                               | <i>S17</i> |
| <i>Compound 7</i>                                                                                                                               | <i>S18</i> |
| <b><sup>1</sup>H-NMR, <sup>13</sup>C-NMR and ESI-MS spectra of the isolated compounds obtained by oxidation with H<sub>2</sub>O<sub>2</sub></b> | <b>S19</b> |
| <i>Diethylamine•HCl</i>                                                                                                                         | <i>S19</i> |
| <i>Dibenzylamine•HCl</i>                                                                                                                        | <i>S20</i> |
| <i>Morpholine•HCl</i>                                                                                                                           | <i>S23</i> |
| <i>Isoindoline•HCl</i>                                                                                                                          | <i>S24</i> |
| <i>Benzylamine•HCl</i>                                                                                                                          | <i>S26</i> |
| <i>p-nitrobenzylamine•HCl</i>                                                                                                                   | <i>S27</i> |
| <i>N-ethylbenzylamine•HCl</i>                                                                                                                   | <i>S29</i> |
| <b>Table S1. Gibbs free energies relative to free reactants for the selenoxide-triggered amine formation</b>                                    | <b>S31</b> |
| <b>Table S2 Geometries of the optimized structures of the selenoxide-triggered amine formation reaction.</b>                                    | <b>S31</b> |

## NMR and ESI-MS characterization of compounds 1-9

### Compound 1

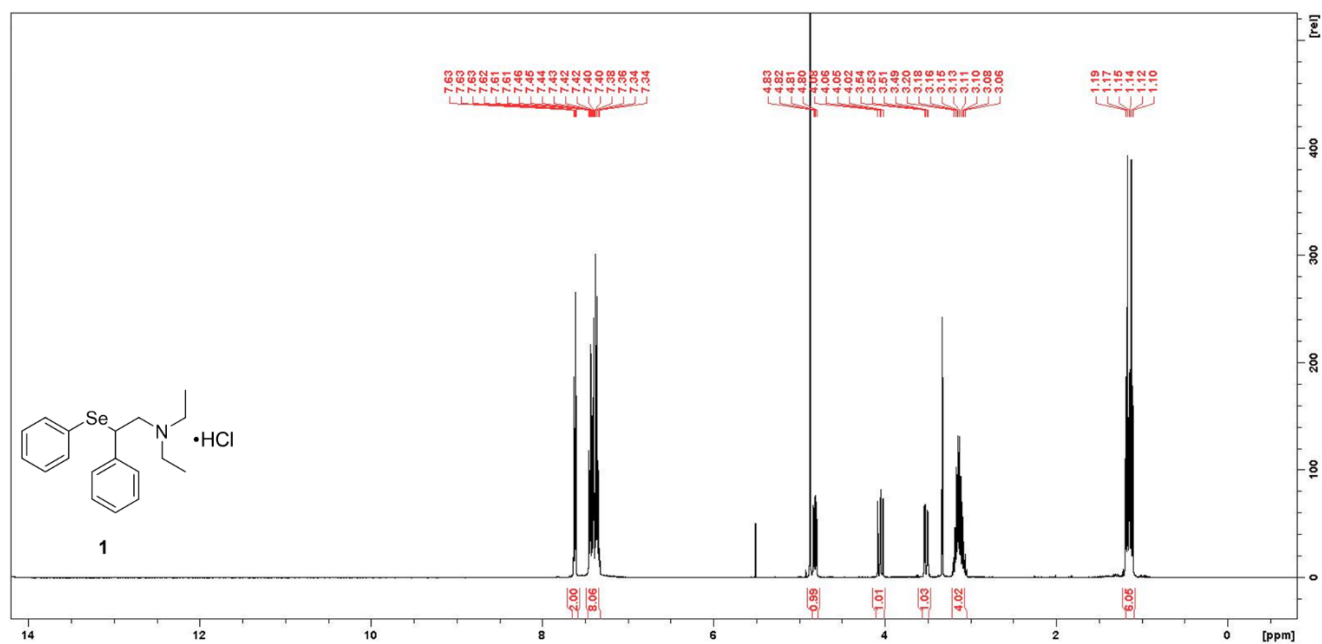

Figure S1. <sup>1</sup>H-NMR spectrum of compound 1.

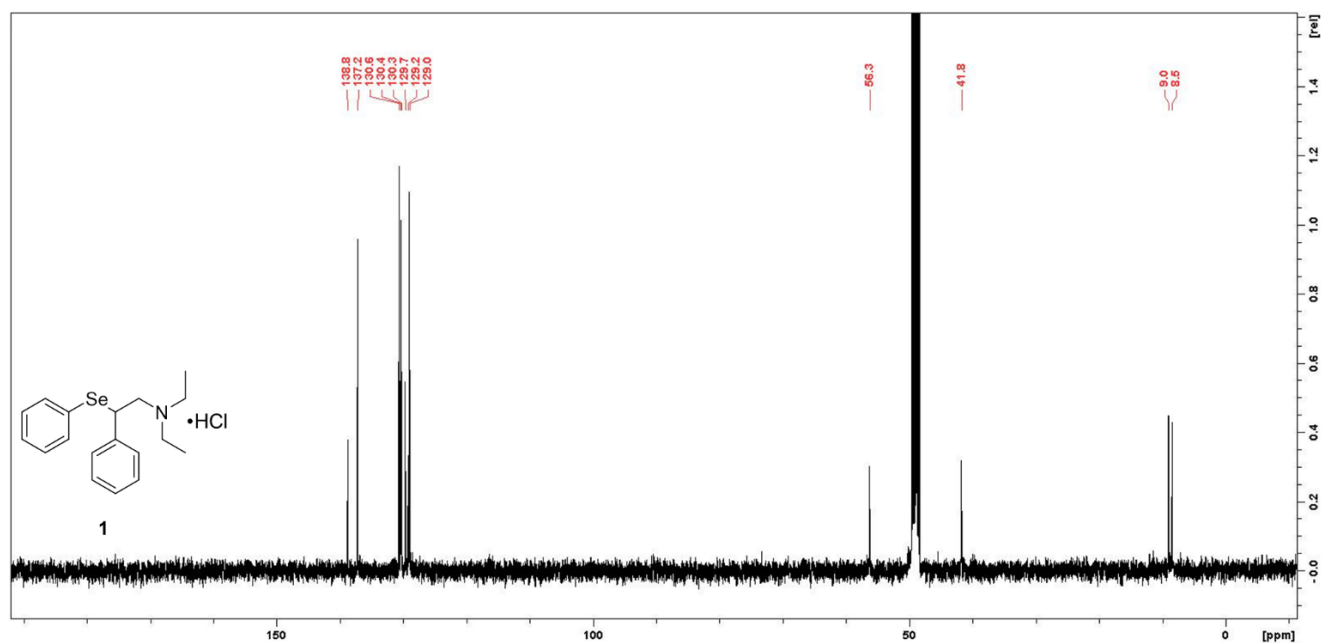

Figure S2. <sup>13</sup>C-NMR spectrum of compound 1.

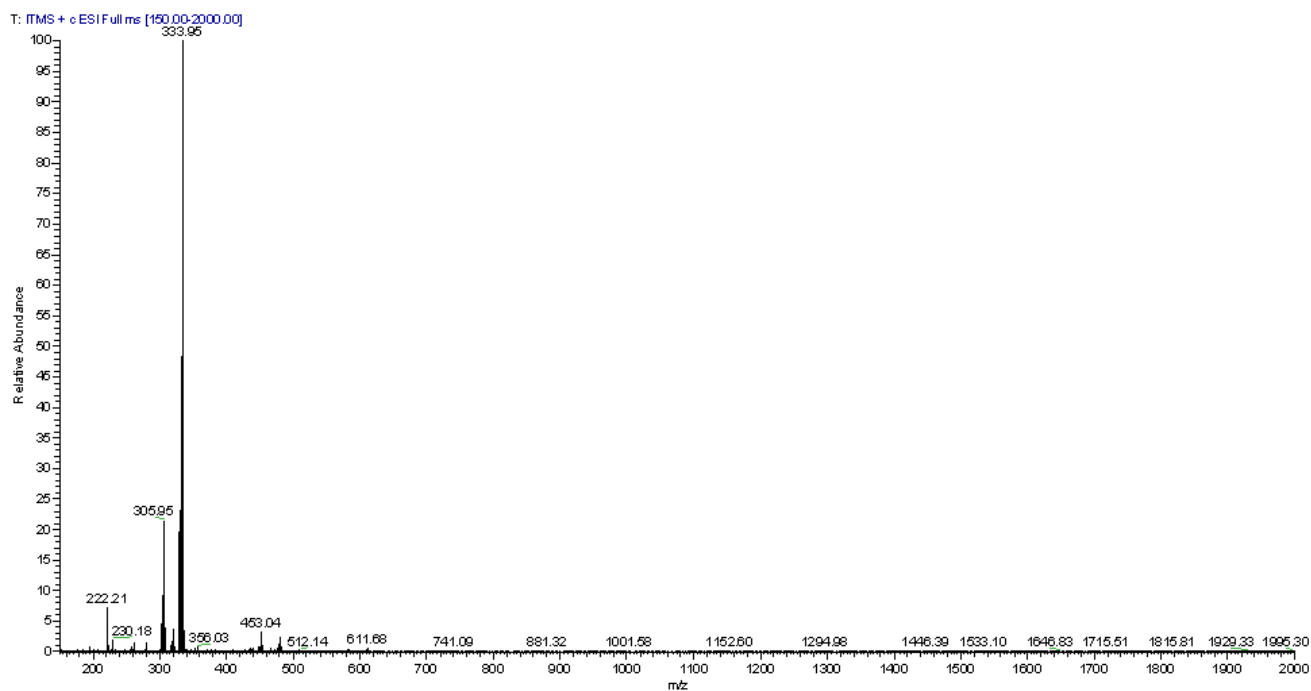

Figure S3. ESI-MS spectrum of compound 1.

### Compound 2

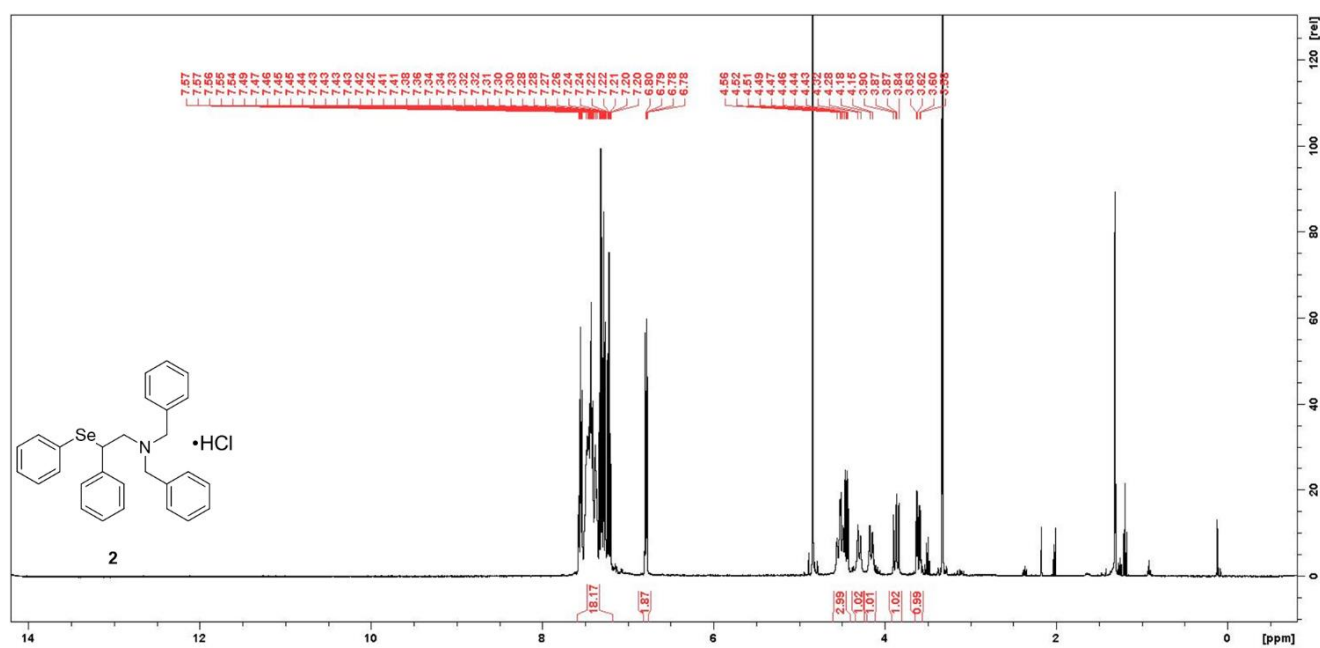

Figure S4.  $^1\text{H}$ -NMR spectrum of compound 2 ( $\delta_{\text{H}}$  1.33 ppm = traces of silicon grease).

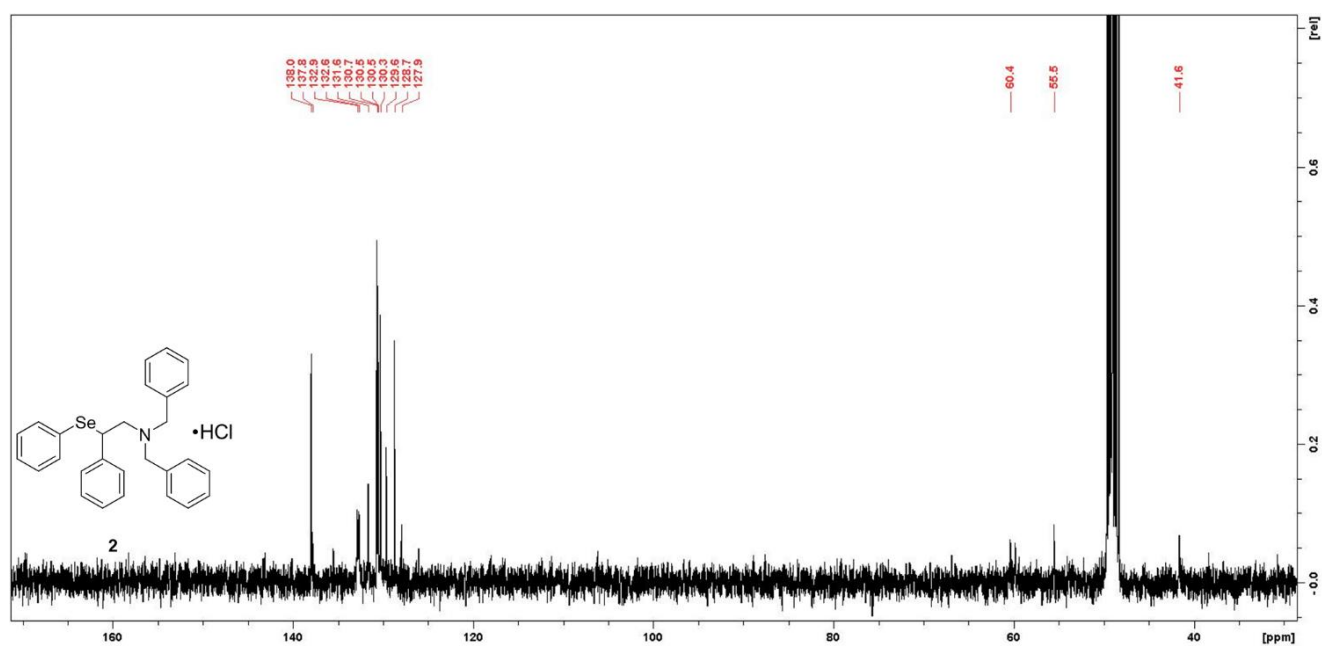

Figure S5. <sup>13</sup>C-NMR spectrum of compound 2.

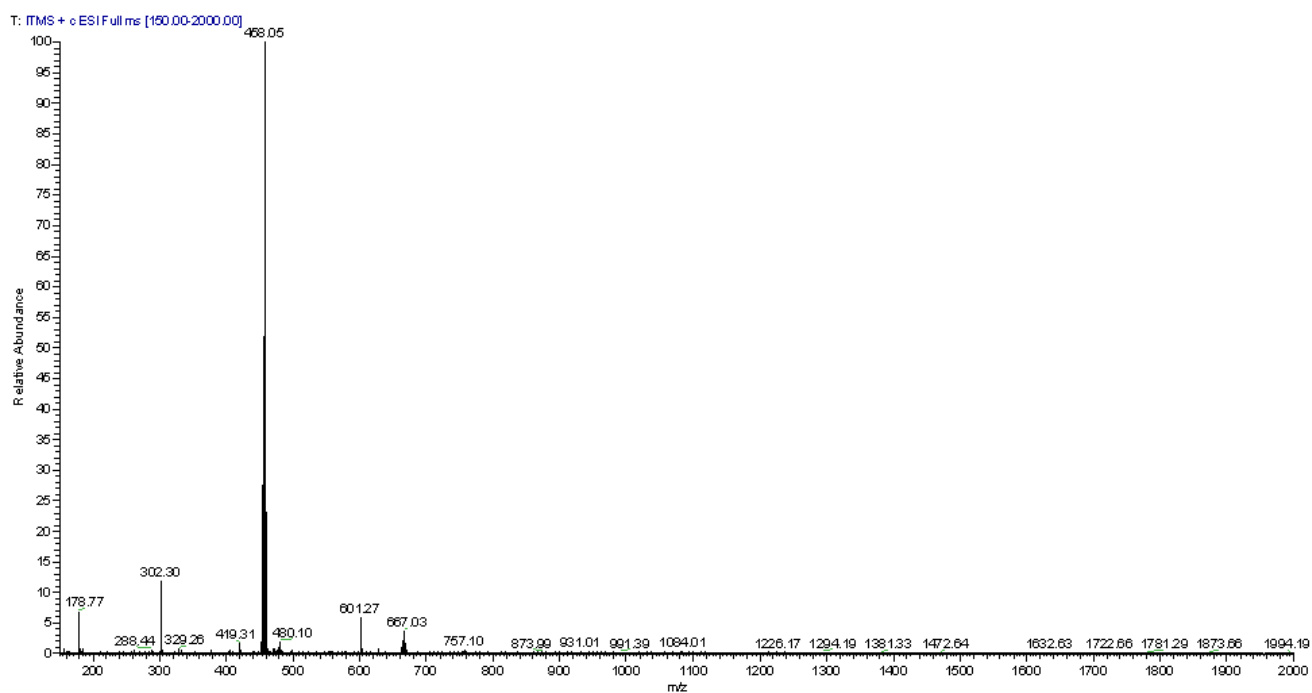

Figure S6. ESI-MS spectrum of compound 2.

Compound 3

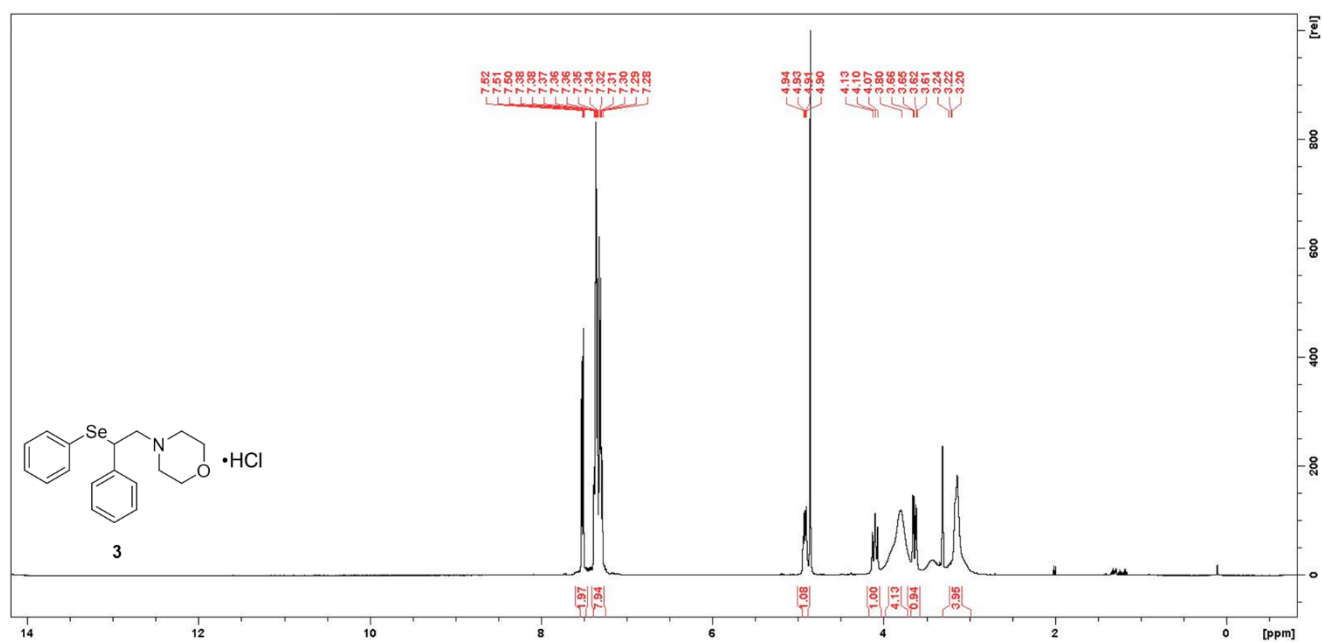

Figure S7. <sup>1</sup>H-NMR spectrum of compound 3.

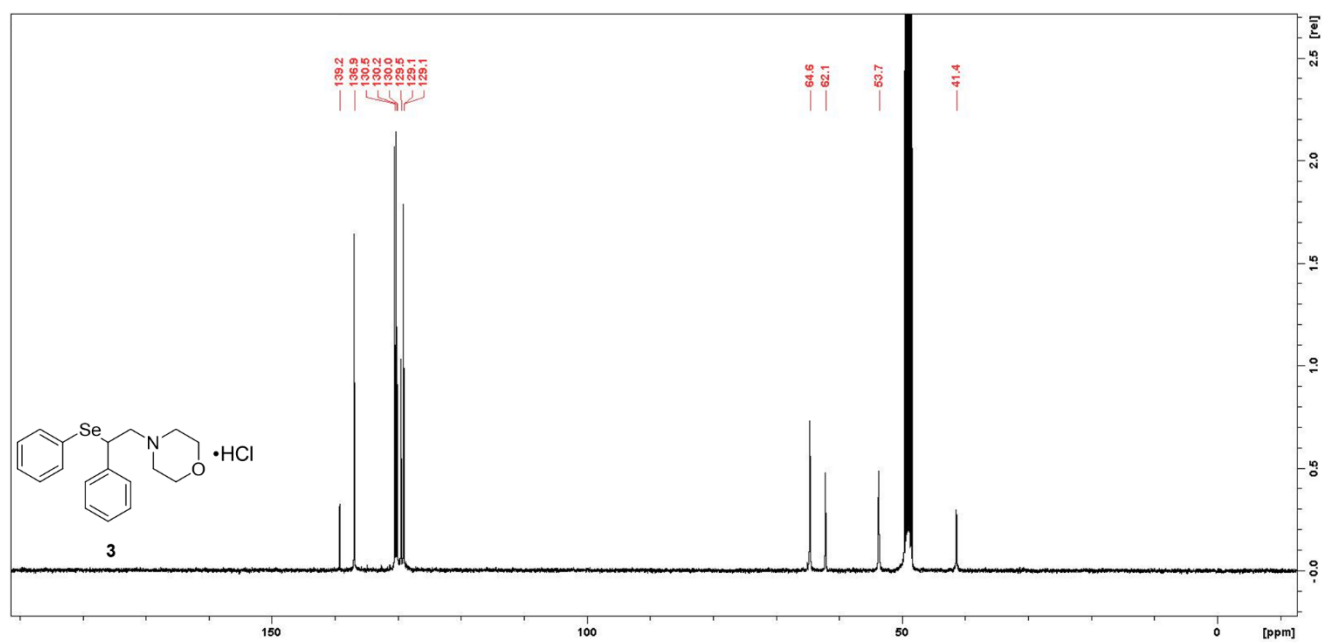

Figure S8. <sup>13</sup>C-NMR spectrum of compound 3.

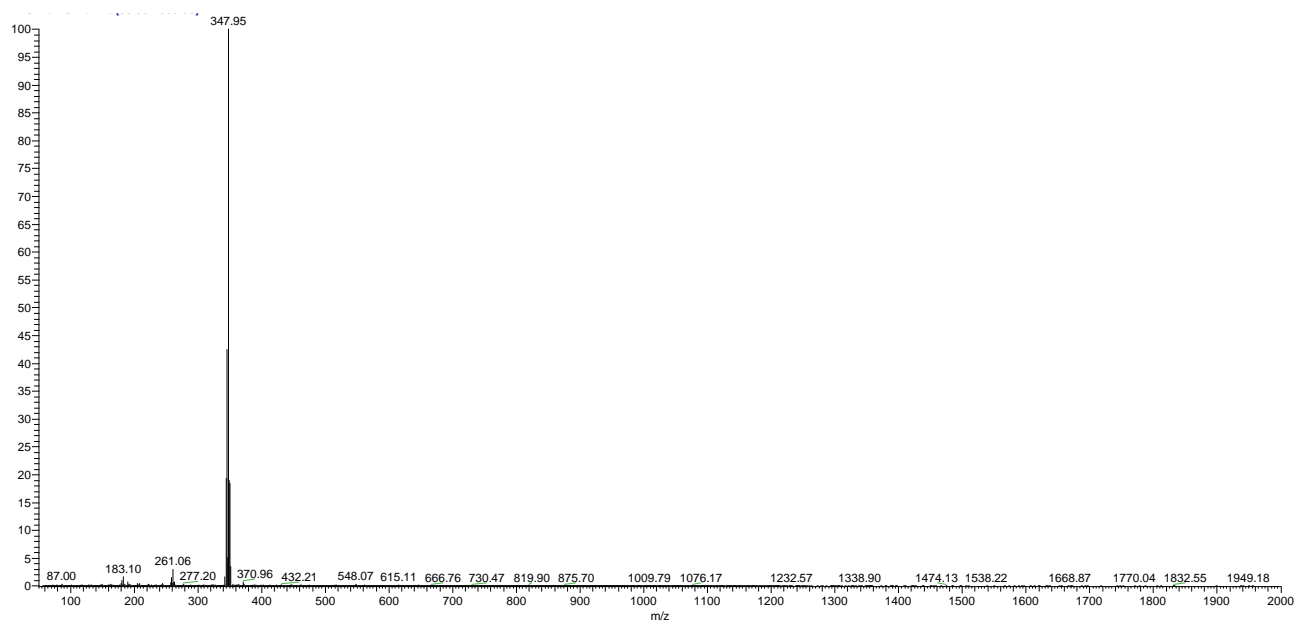

Figure S9. ESI-MS spectrum of compound **3**.

#### Compound **4**

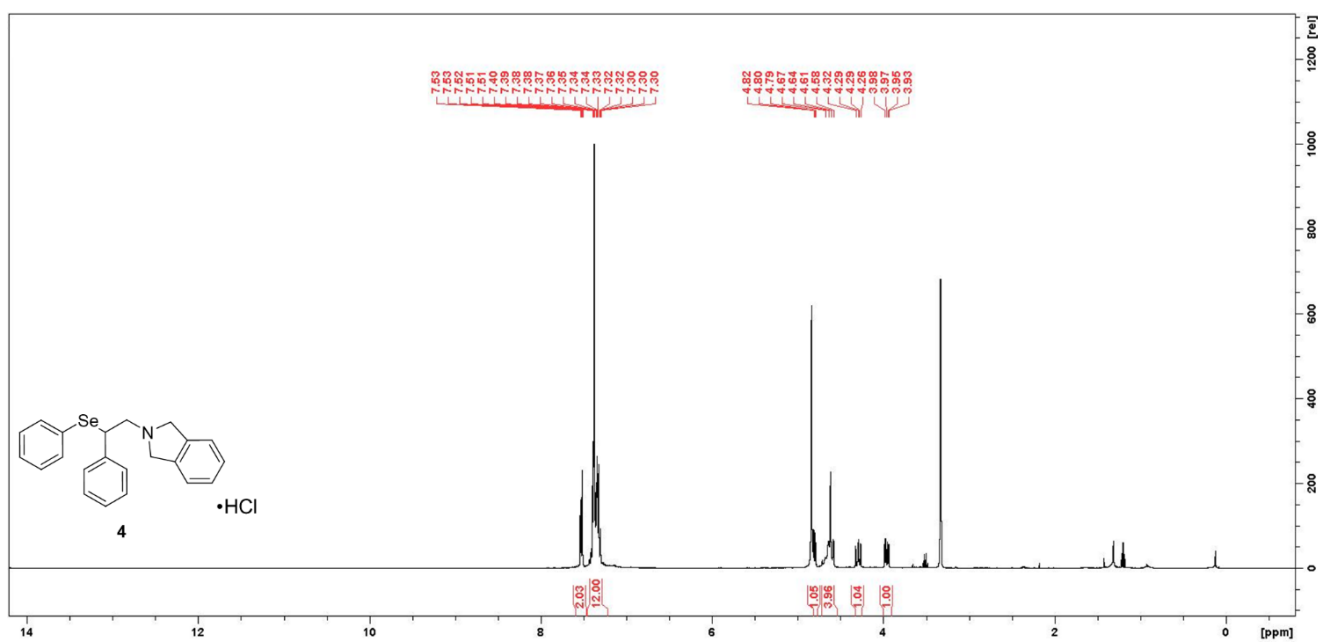

Figure S10.  $^1\text{H}$ -NMR spectrum of compound **4**.

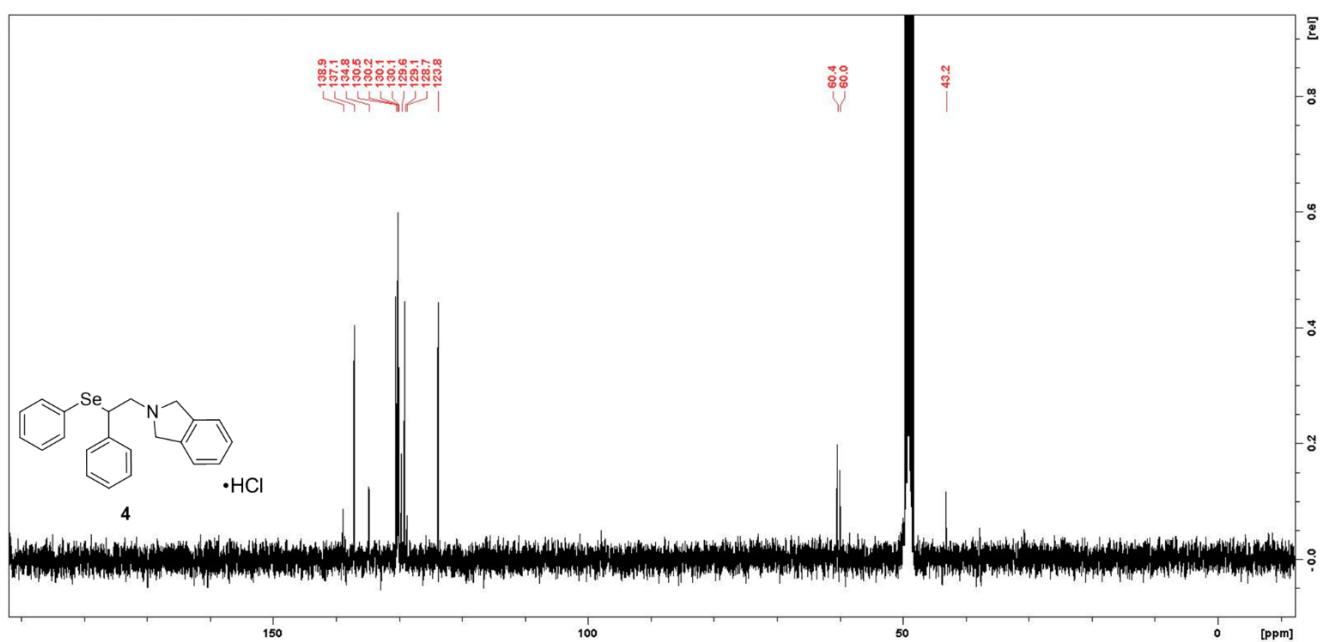

Figure S11. <sup>13</sup>C-NMR spectrum of compound 4.

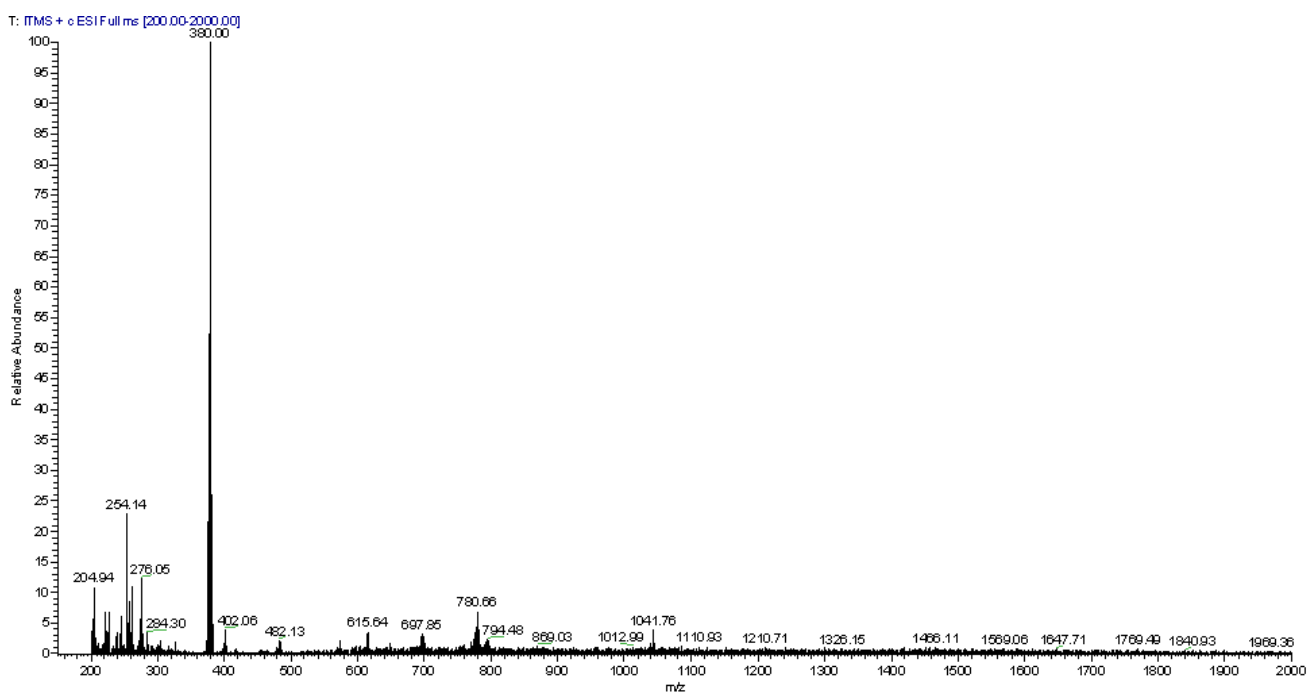

Figure S12. ESI-MS spectrum of compound 4.



Compound 5

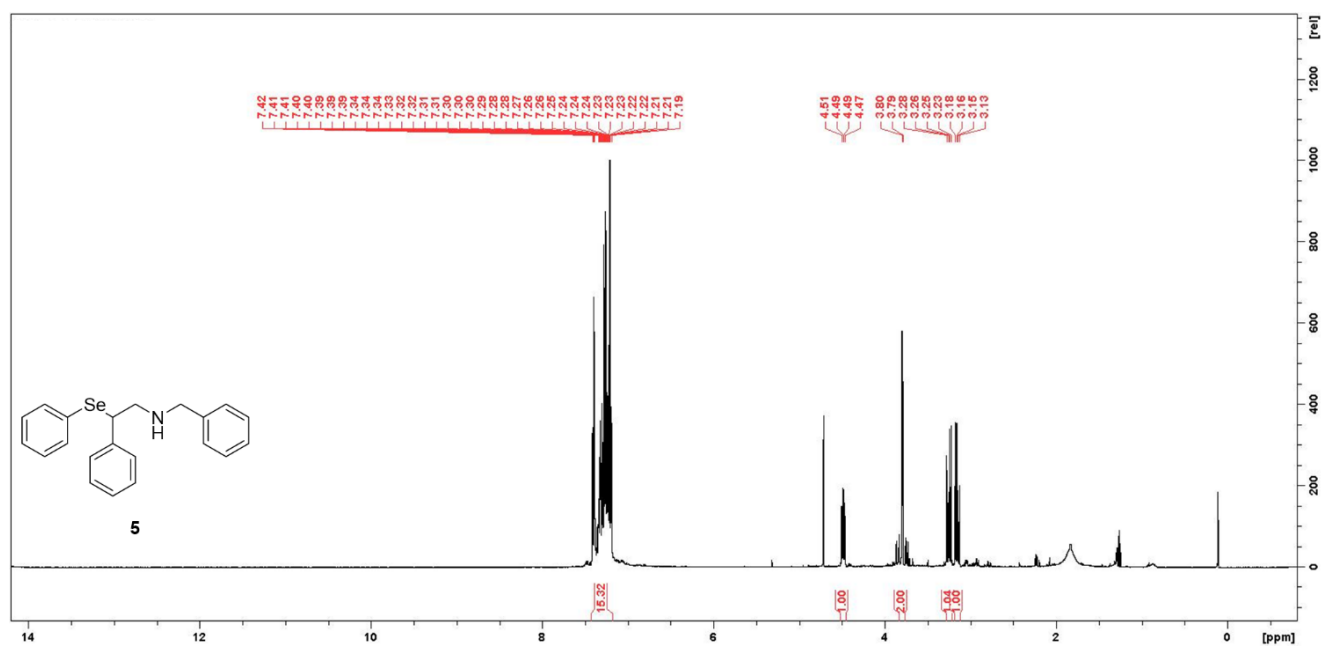

Figure S13. <sup>1</sup>H-NMR spectrum of compound 5.

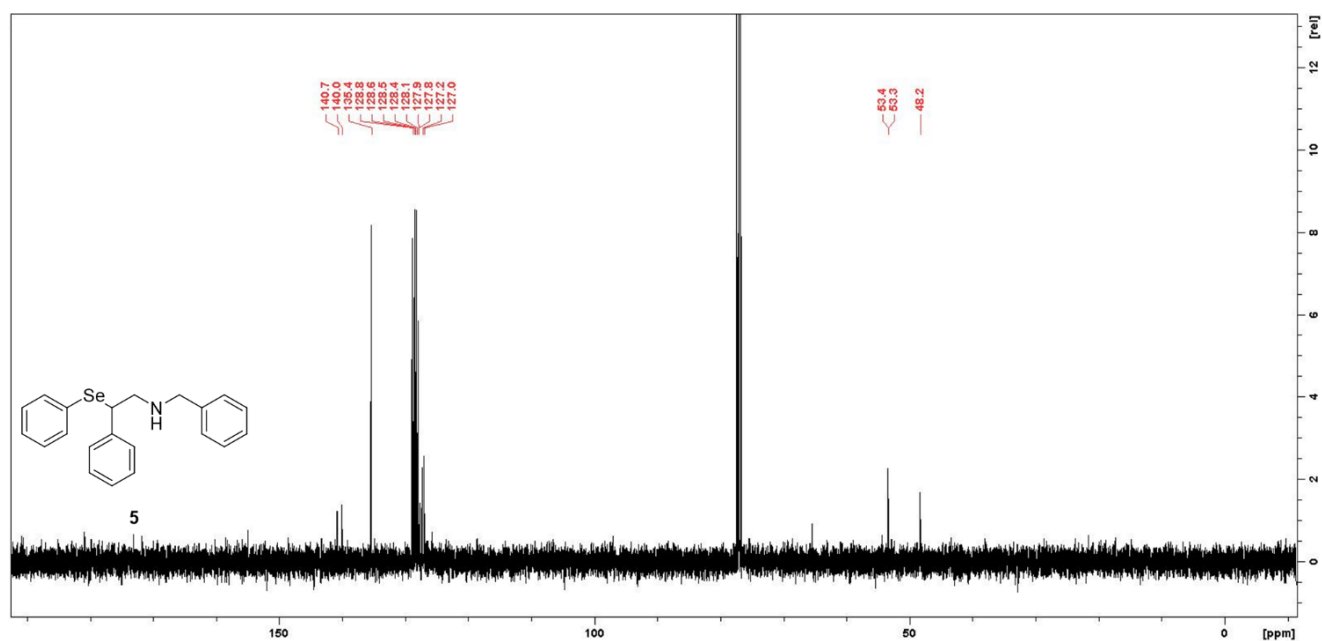

Figure S14. <sup>13</sup>C-NMR spectrum of compound 5.

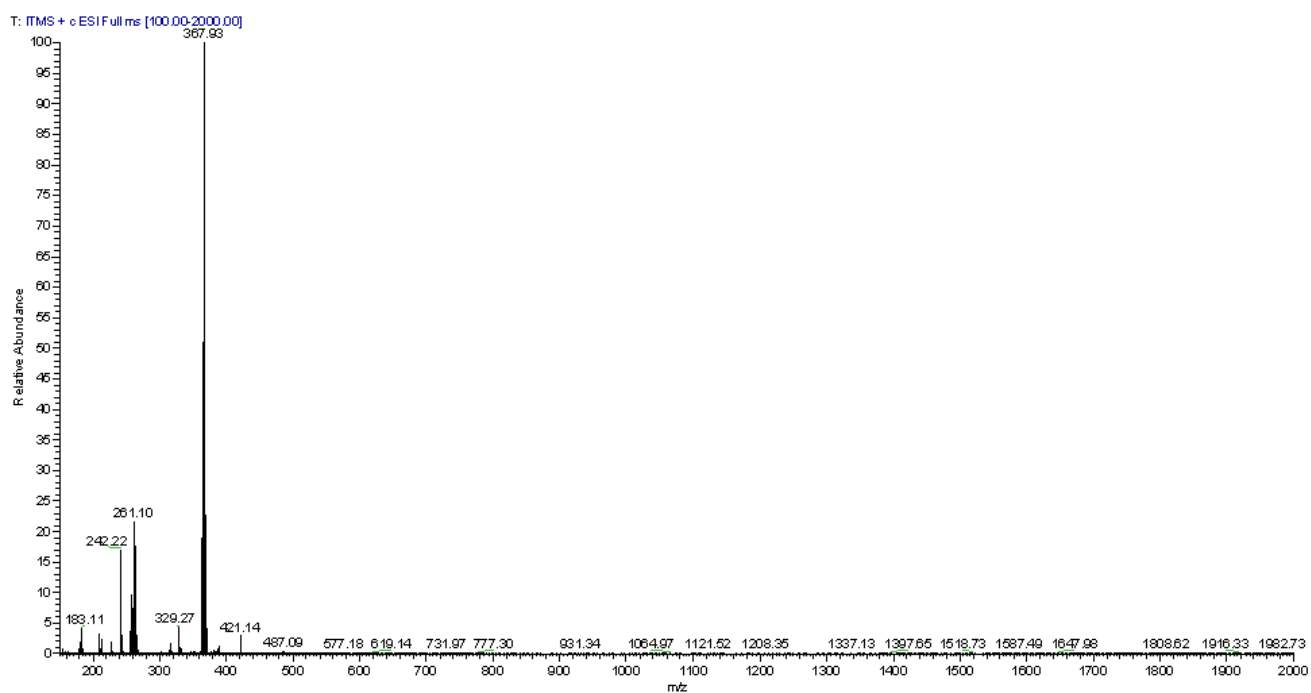

Figure S15. ESI-MS spectrum of compound **5**.

*Compound 6*

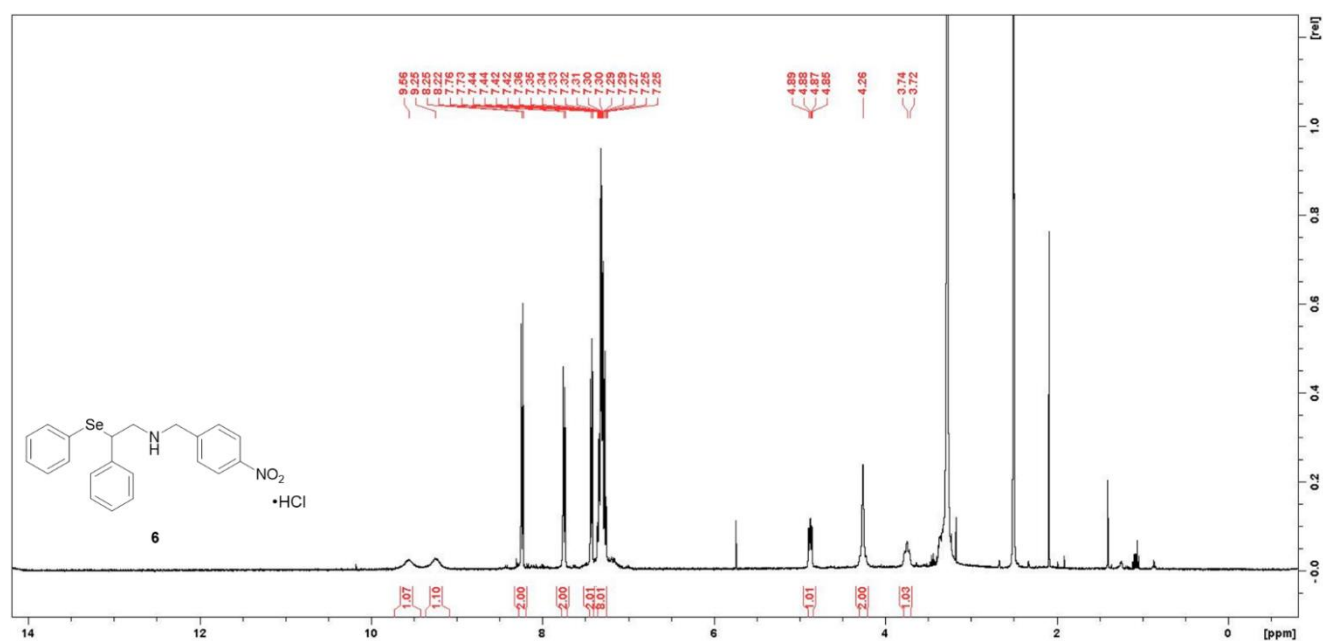

Figure S16.  $^1\text{H}$ -NMR spectrum of compound **6**.

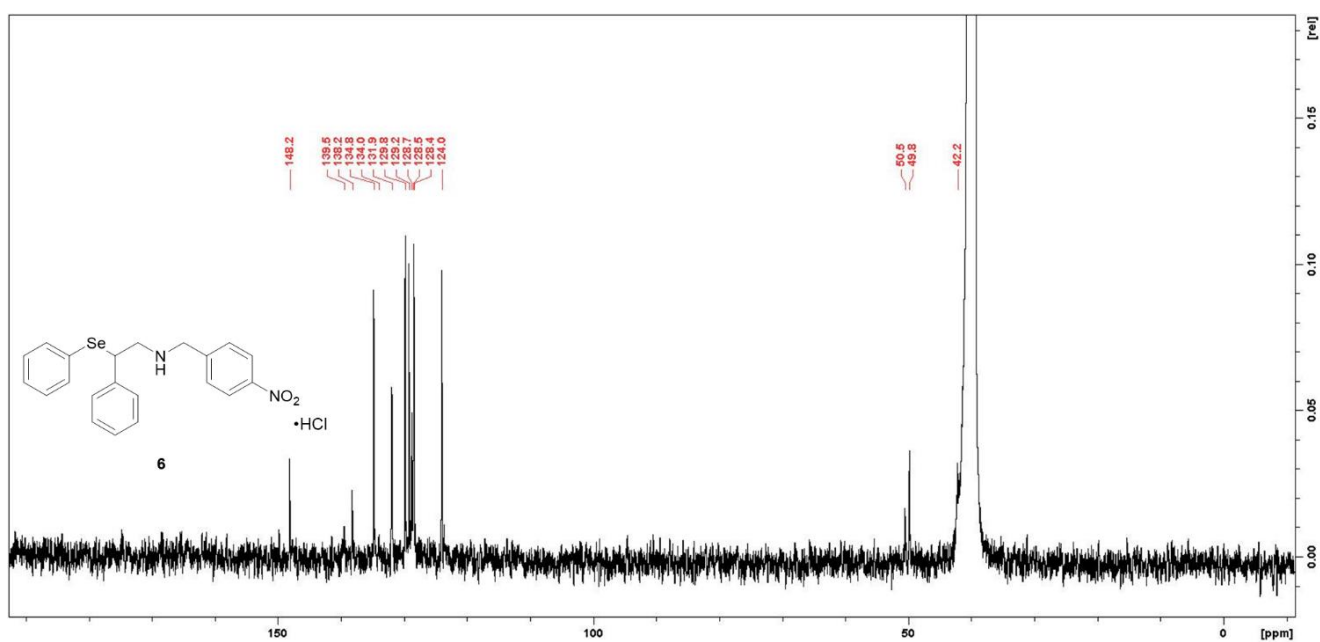

Figure S17. <sup>13</sup>C-NMR spectrum of compound 6.

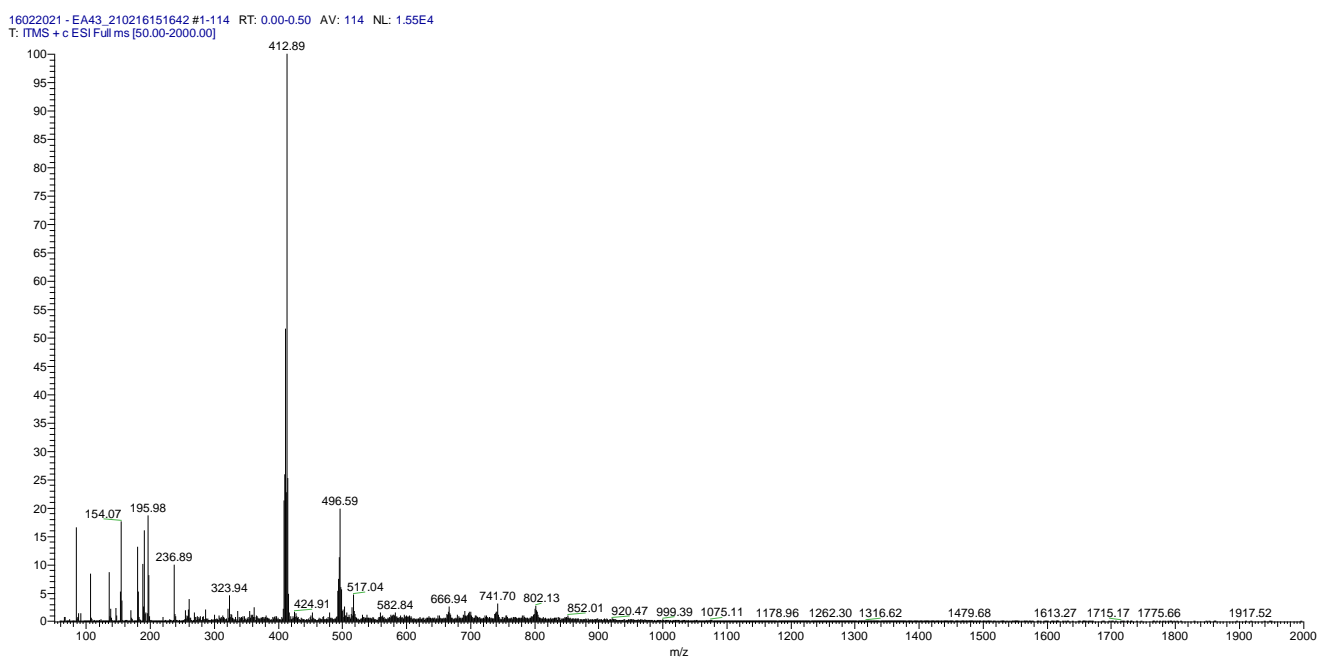

Figure S18. ESI-MS spectrum of compound 6.

**Chemical structure of 7:** CCN(CC)c1ccccc1C(Se(c2ccccc2)c3ccccc3)Cl

**<sup>1</sup>H NMR spectrum (CDCl<sub>3</sub>):**

| Chemical Shift (ppm)                                                                                                                                                                                                                                                                                                                                                                                                                                                                                                                                                                                                                                                                                                                                                                                                                                                                                                                                                                                                                                                                                                                                                                                                                                                                                                                                                                                                                                                                                                                                                                                                                                                                                                                                                                                                                                                                                                                                                                                                                                                                                                                                                                                                                                                                                                                                                                                                                                                                                                                                                                           | Integration |
|------------------------------------------------------------------------------------------------------------------------------------------------------------------------------------------------------------------------------------------------------------------------------------------------------------------------------------------------------------------------------------------------------------------------------------------------------------------------------------------------------------------------------------------------------------------------------------------------------------------------------------------------------------------------------------------------------------------------------------------------------------------------------------------------------------------------------------------------------------------------------------------------------------------------------------------------------------------------------------------------------------------------------------------------------------------------------------------------------------------------------------------------------------------------------------------------------------------------------------------------------------------------------------------------------------------------------------------------------------------------------------------------------------------------------------------------------------------------------------------------------------------------------------------------------------------------------------------------------------------------------------------------------------------------------------------------------------------------------------------------------------------------------------------------------------------------------------------------------------------------------------------------------------------------------------------------------------------------------------------------------------------------------------------------------------------------------------------------------------------------------------------------------------------------------------------------------------------------------------------------------------------------------------------------------------------------------------------------------------------------------------------------------------------------------------------------------------------------------------------------------------------------------------------------------------------------------------------------|-------------|
| 7.51, 7.49, 7.46, 7.43, 7.41, 7.40, 7.36, 7.33, 7.30, 7.28, 7.09, 7.07, 7.05, 7.04, 7.03, 7.01, 6.99, 6.97, 6.95, 6.93, 6.91, 6.89, 6.87, 6.85, 6.83, 6.81, 6.79, 6.77, 6.75, 6.73, 6.71, 6.69, 6.67, 6.65, 6.63, 6.61, 6.59, 6.57, 6.55, 6.53, 6.51, 6.49, 6.47, 6.45, 6.43, 6.41, 6.39, 6.37, 6.35, 6.33, 6.31, 6.29, 6.27, 6.25, 6.23, 6.21, 6.19, 6.17, 6.15, 6.13, 6.11, 6.09, 6.07, 6.05, 6.03, 6.01, 5.99, 5.97, 5.95, 5.93, 5.91, 5.89, 5.87, 5.85, 5.83, 5.81, 5.79, 5.77, 5.75, 5.73, 5.71, 5.69, 5.67, 5.65, 5.63, 5.61, 5.59, 5.57, 5.55, 5.53, 5.51, 5.49, 5.47, 5.45, 5.43, 5.41, 5.39, 5.37, 5.35, 5.33, 5.31, 5.29, 5.27, 5.25, 5.23, 5.21, 5.19, 5.17, 5.15, 5.13, 5.11, 5.09, 5.07, 5.05, 5.03, 5.01, 4.99, 4.97, 4.95, 4.93, 4.91, 4.89, 4.87, 4.85, 4.83, 4.81, 4.79, 4.77, 4.75, 4.73, 4.71, 4.69, 4.67, 4.65, 4.63, 4.61, 4.59, 4.57, 4.55, 4.53, 4.51, 4.49, 4.47, 4.45, 4.43, 4.41, 4.39, 4.37, 4.35, 4.33, 4.31, 4.29, 4.27, 4.25, 4.23, 4.21, 4.19, 4.17, 4.15, 4.13, 4.11, 4.09, 4.07, 4.05, 4.03, 4.01, 3.99, 3.97, 3.95, 3.93, 3.91, 3.89, 3.87, 3.85, 3.83, 3.81, 3.79, 3.77, 3.75, 3.73, 3.71, 3.69, 3.67, 3.65, 3.63, 3.61, 3.59, 3.57, 3.55, 3.53, 3.51, 3.49, 3.47, 3.45, 3.43, 3.41, 3.39, 3.37, 3.35, 3.33, 3.31, 3.29, 3.27, 3.25, 3.23, 3.21, 3.19, 3.17, 3.15, 3.13, 3.11, 3.09, 3.07, 3.05, 3.03, 3.01, 2.99, 2.97, 2.95, 2.93, 2.91, 2.89, 2.87, 2.85, 2.83, 2.81, 2.79, 2.77, 2.75, 2.73, 2.71, 2.69, 2.67, 2.65, 2.63, 2.61, 2.59, 2.57, 2.55, 2.53, 2.51, 2.49, 2.47, 2.45, 2.43, 2.41, 2.39, 2.37, 2.35, 2.33, 2.31, 2.29, 2.27, 2.25, 2.23, 2.21, 2.19, 2.17, 2.15, 2.13, 2.11, 2.09, 2.07, 2.05, 2.03, 2.01, 1.99, 1.97, 1.95, 1.93, 1.91, 1.89, 1.87, 1.85, 1.83, 1.81, 1.79, 1.77, 1.75, 1.73, 1.71, 1.69, 1.67, 1.65, 1.63, 1.61, 1.59, 1.57, 1.55, 1.53, 1.51, 1.49, 1.47, 1.45, 1.43, 1.41, 1.39, 1.37, 1.35, 1.33, 1.31, 1.29, 1.27, 1.25, 1.23, 1.21, 1.19, 1.17, 1.15, 1.13, 1.11, 1.09, 1.07, 1.05, 1.03, 1.01, 0.99, 0.97, 0.95, 0.93, 0.91, 0.89, 0.87, 0.85, 0.83, 0.81, 0.79, 0.77, 0.75, 0.73, 0.71, 0.69, 0.67, 0.65, 0.63, 0.61, 0.59, 0.57, 0.55, 0.53, 0.51, 0.49, 0.47, 0.45, 0.43, 0.41, 0.39, 0.37, 0.35, 0.33, 0.31, 0.29, 0.27, 0.25, 0.23, 0.21, 0.19, 0.17, 0.15, 0.13, 0.11, 0.09, 0.07, 0.05, 0.03, 0.01, 0.99, 0.97, 0.95, 0.93, 0.91, 0.89, 0.87, 0.85, 0.83, 0.81, 0.79, 0.77, 0.75, 0.73, 0.71, 0.69, 0.67, 0.65, 0.63, 0.61, 0.59, 0.57, 0.55, 0.53, 0.51, 0.49, 0.47, 0.45, 0.43, 0.41, 0.39, 0.37, 0.35, 0.33, 0.31, 0.29, 0.27, 0.25, 0.23, 0.21, 0.19, 0.17, 0.15, 0.13, 0.11, 0.09, 0.07, 0.05, 0.03, 0.01 | 15.00       |

Chemical structure of compound **7** is shown: CCN(CCc1ccccc1)Cc2ccccc2[Se]c3ccccc3 · HCl.

<sup>13</sup>C NMR spectrum (CDCl<sub>3</sub>) of compound **7** is displayed, showing peaks corresponding to the structure. The x-axis represents chemical shift in ppm, ranging from 0 to 140. The y-axis represents relative intensity [rel].

Key peaks are labeled with their chemical shifts (ppm):

- Aromatic carbons: 138.8, 137.4, 137.3, 132.3, 131.4, 130.6, 130.5, 130.4, 130.3, 130.1, 129.7, 129.6, 129.0, 128.9, 128.8, 128.6.
- Solvent (CDCl<sub>3</sub>): 77.0 (triplet).
- Ethyl group (CH<sub>2</sub>CH<sub>3</sub>): 68.8, 66.3, 60.9, 60.2.
- N-Ethyl group (CH<sub>2</sub>CH<sub>3</sub>): 42.1, 41.4.
- Ethyl methyls (CH<sub>3</sub>): 28.0.
- Phenyl methyls (CH<sub>3</sub>): 8.9, 8.5.

S10

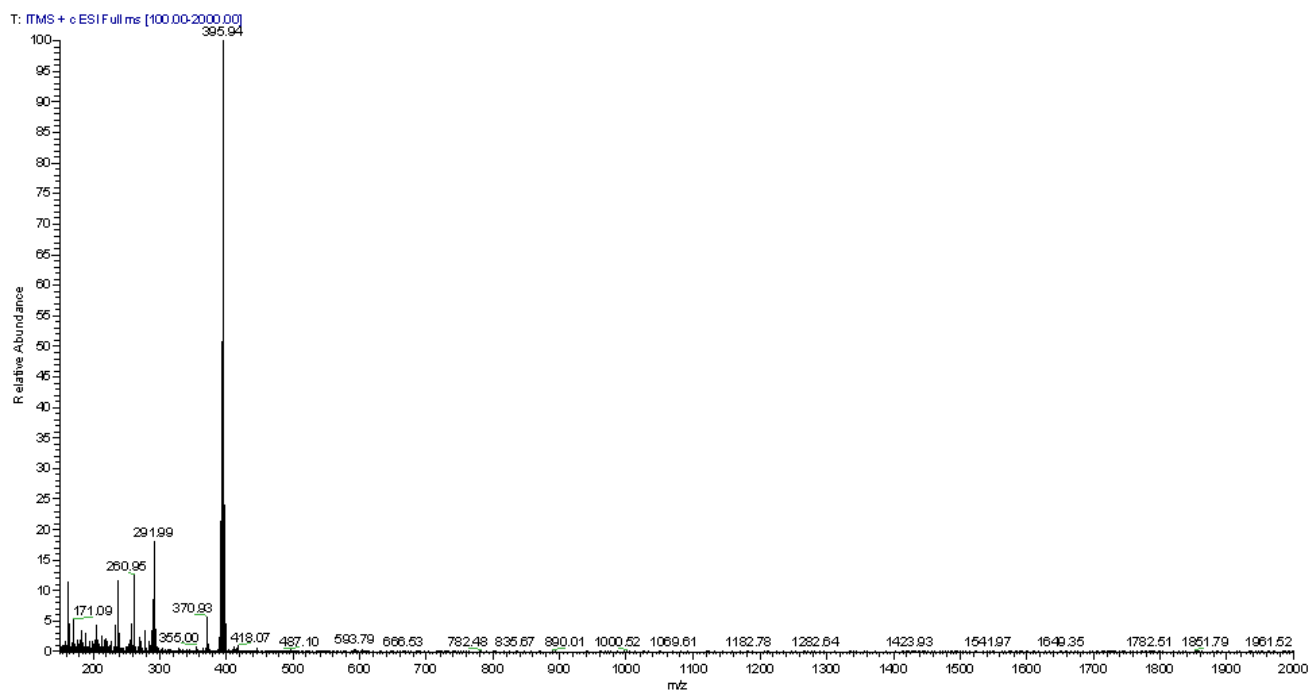

Figure S21. ESI-MS spectrum of compound **7**.

### Compound **8**

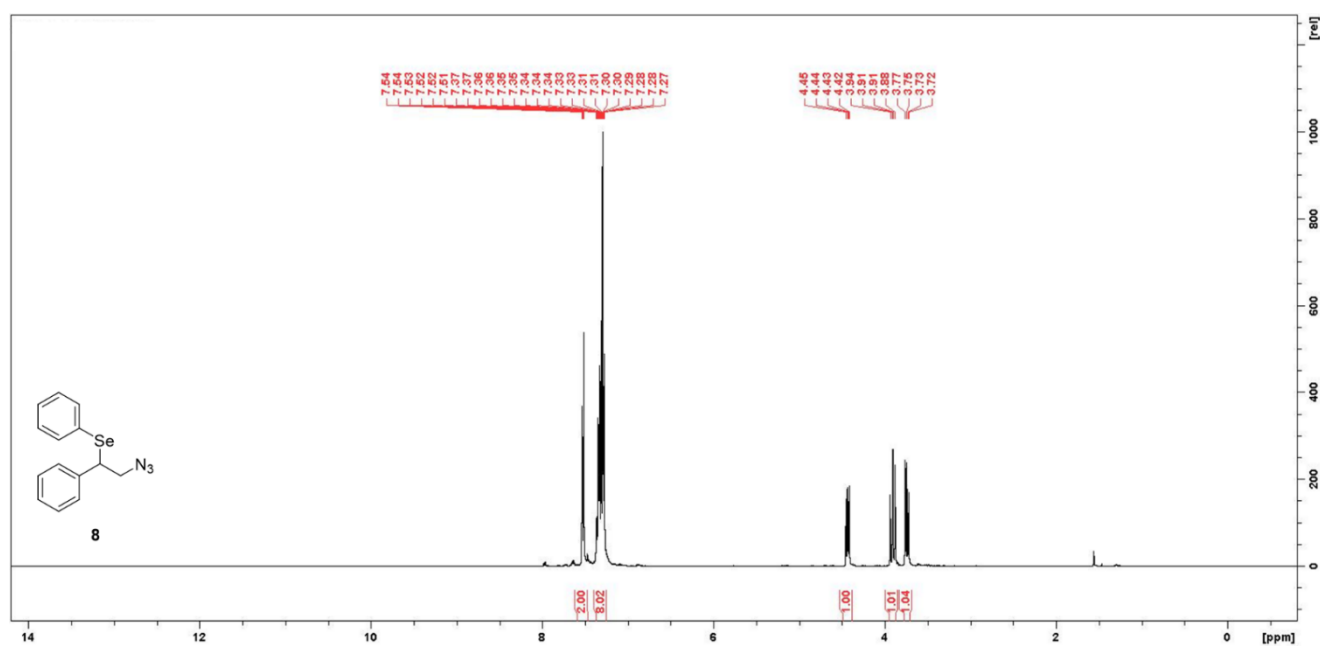

Figure S22. <sup>1</sup>H-NMR spectrum of compound **8**.

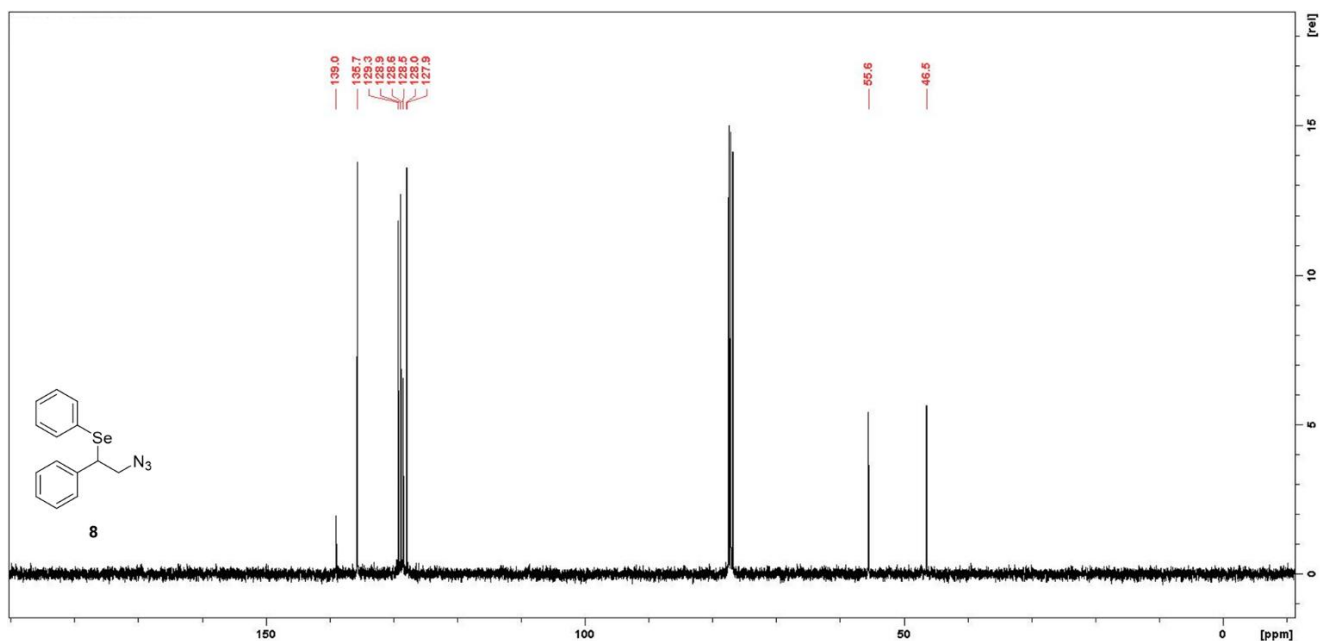

Figure S23. <sup>13</sup>C-NMR spectrum of compound **8**.

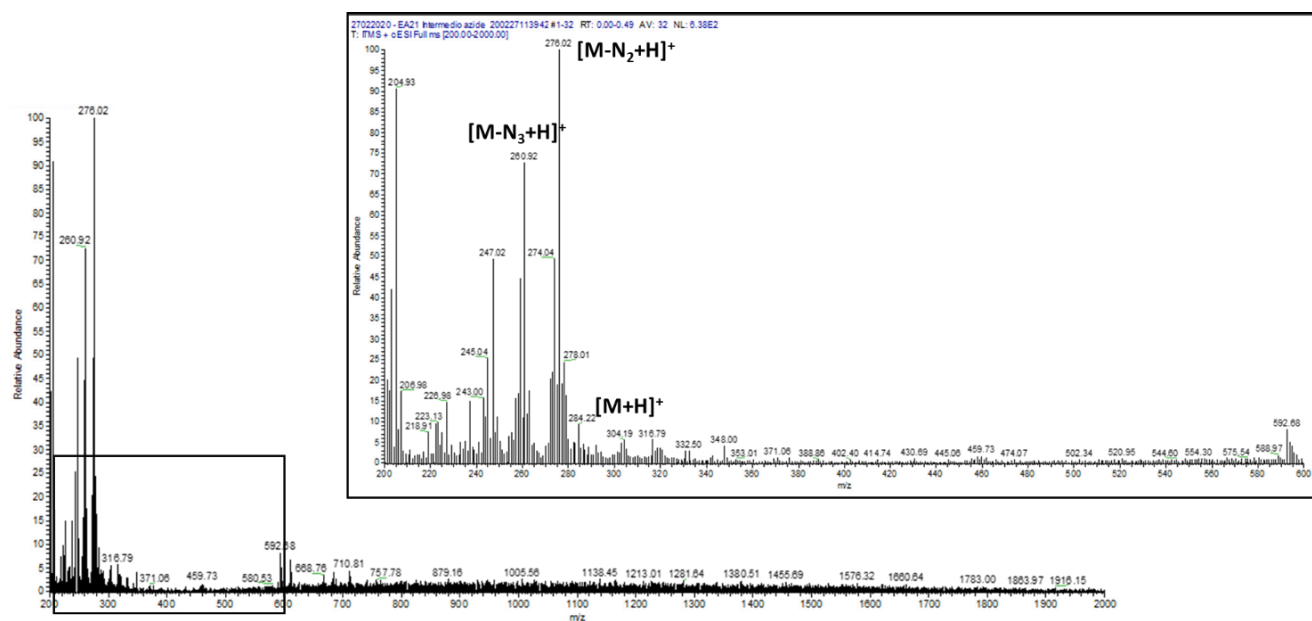

Figure S24. ESI-MS spectrum of compound **8**.

Compound 9

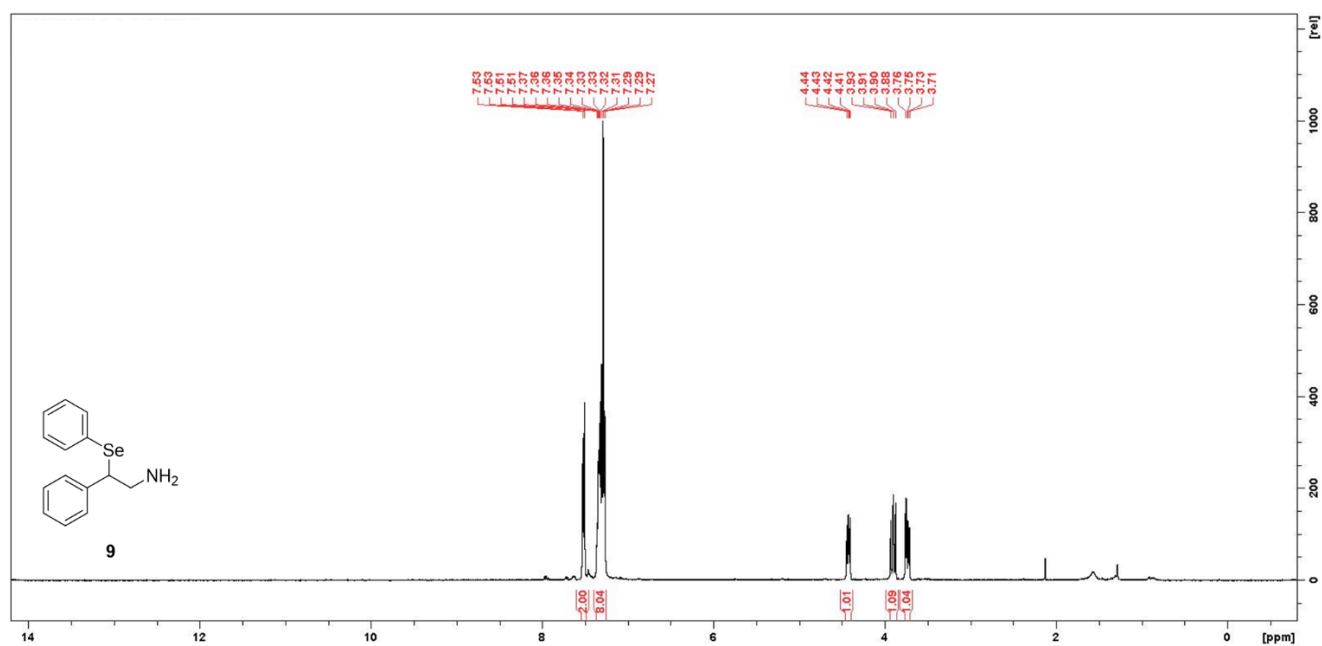

Figure S25. <sup>1</sup>H-NMR spectrum of compound 9.

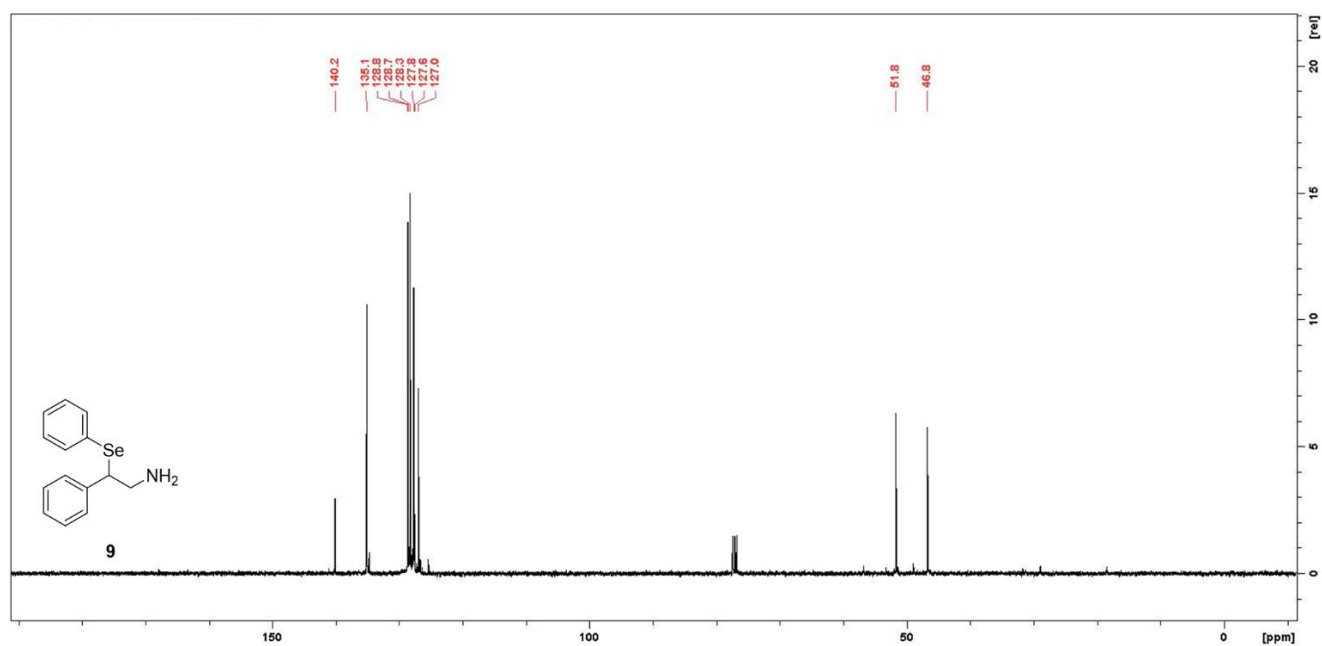

Figure S26. <sup>13</sup>C-NMR spectrum of compound 9.

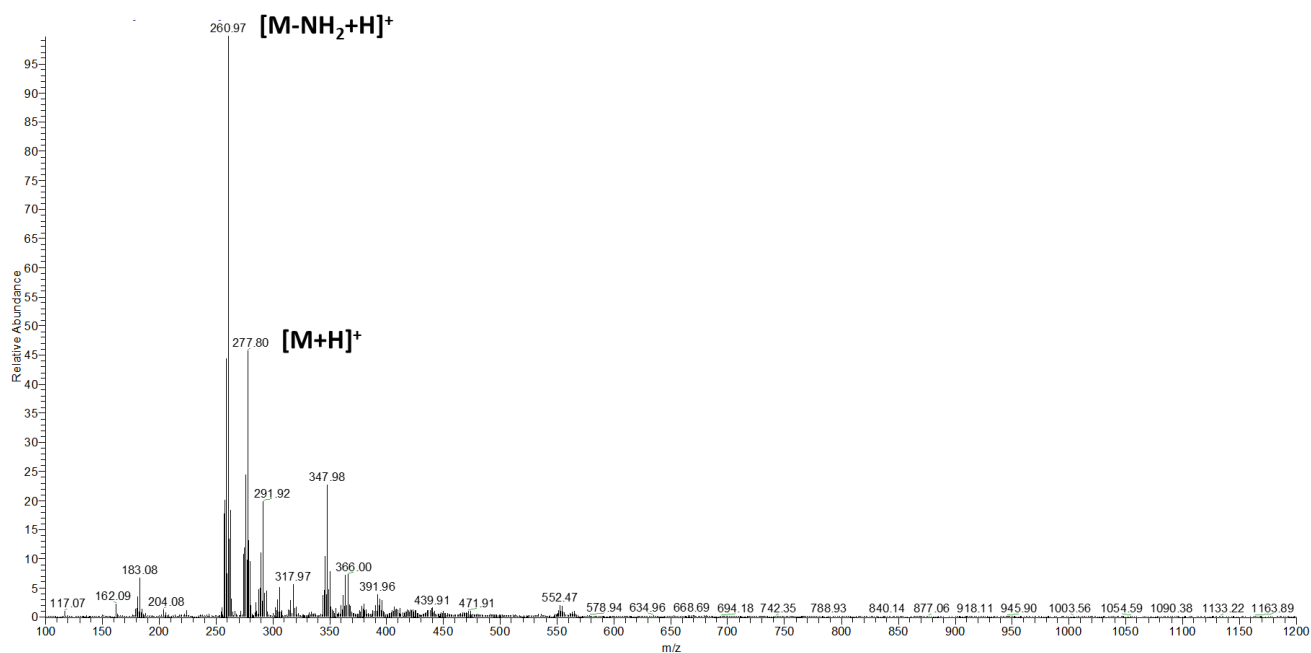

Figure S27. ESI-MS spectrum of compound 9.

## Representative $^1\text{H}$ -NMR and ESI-MS spectra of the oxidation study with $\text{H}_2\text{O}_2$

### Compound 3

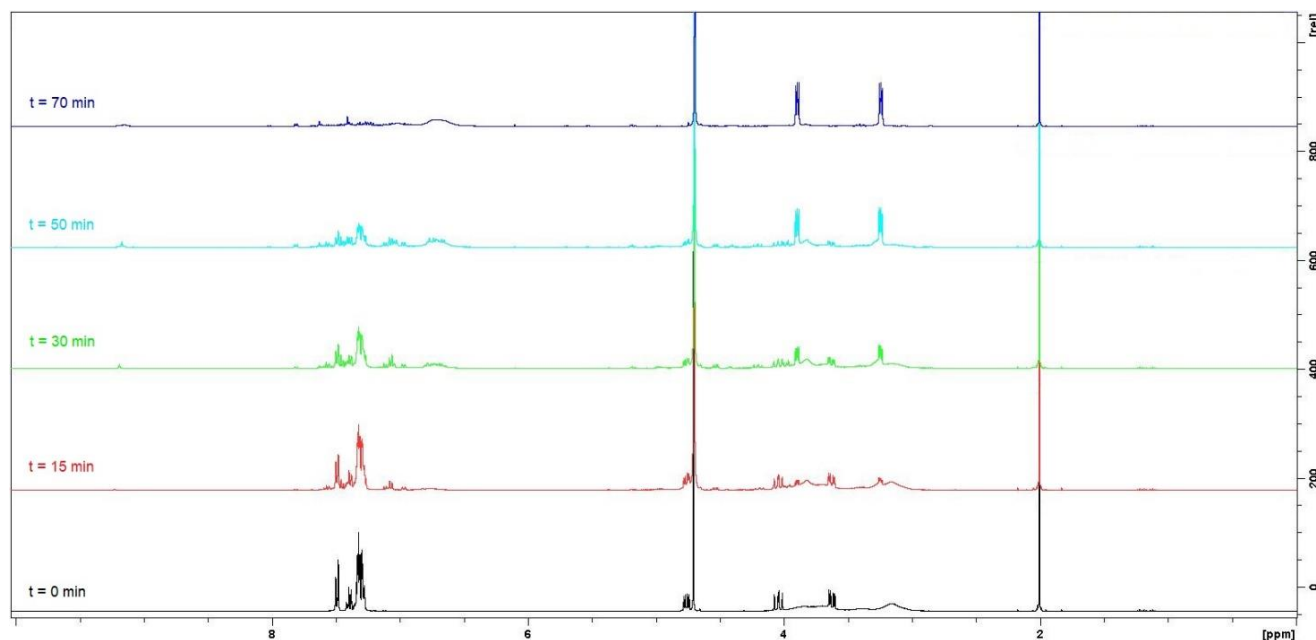

Figure S28. Full  $^1\text{H}$ -NMR spectra over time of the oxidation of compound 3.



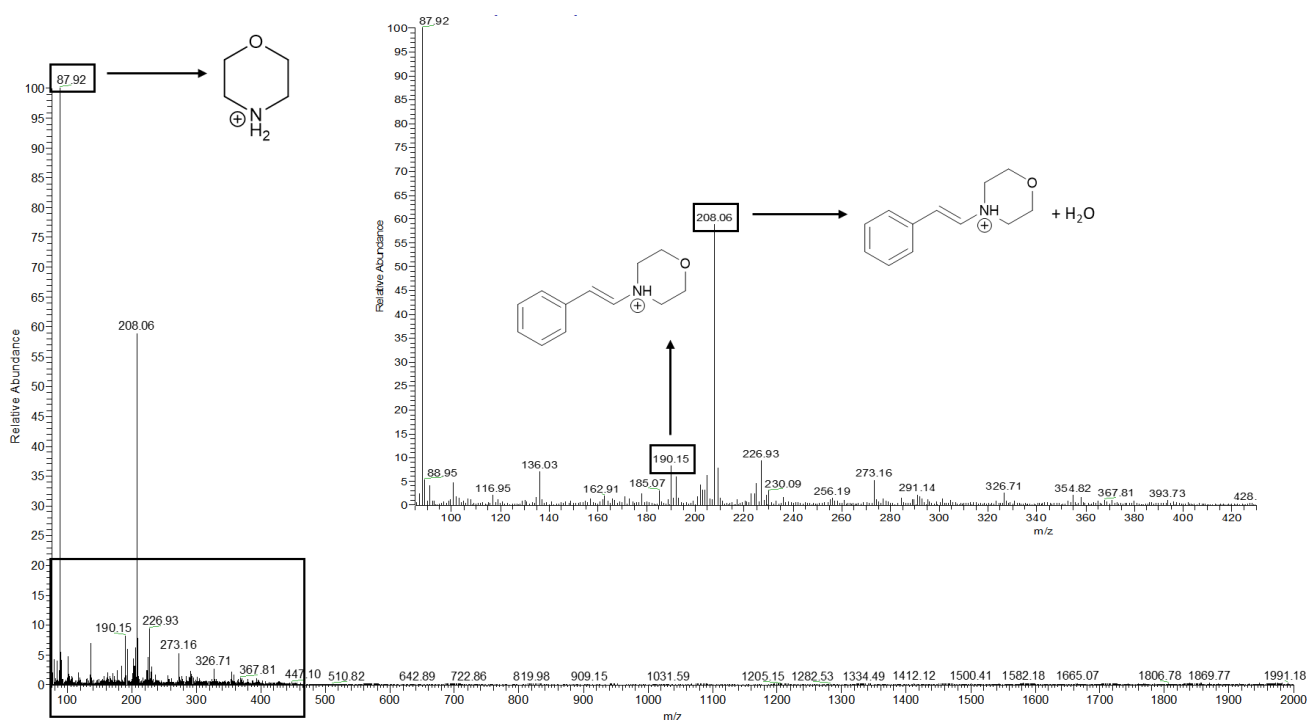

Figure S29. ESI-MS spectrum of the oxidation of compound **3**. The peak at 87.92 m/z corresponds to the final product (*i.e.* morpholine), the peaks at 190.15 and 208.06 m/z correspond respectively to the enamine and its adduct with water.

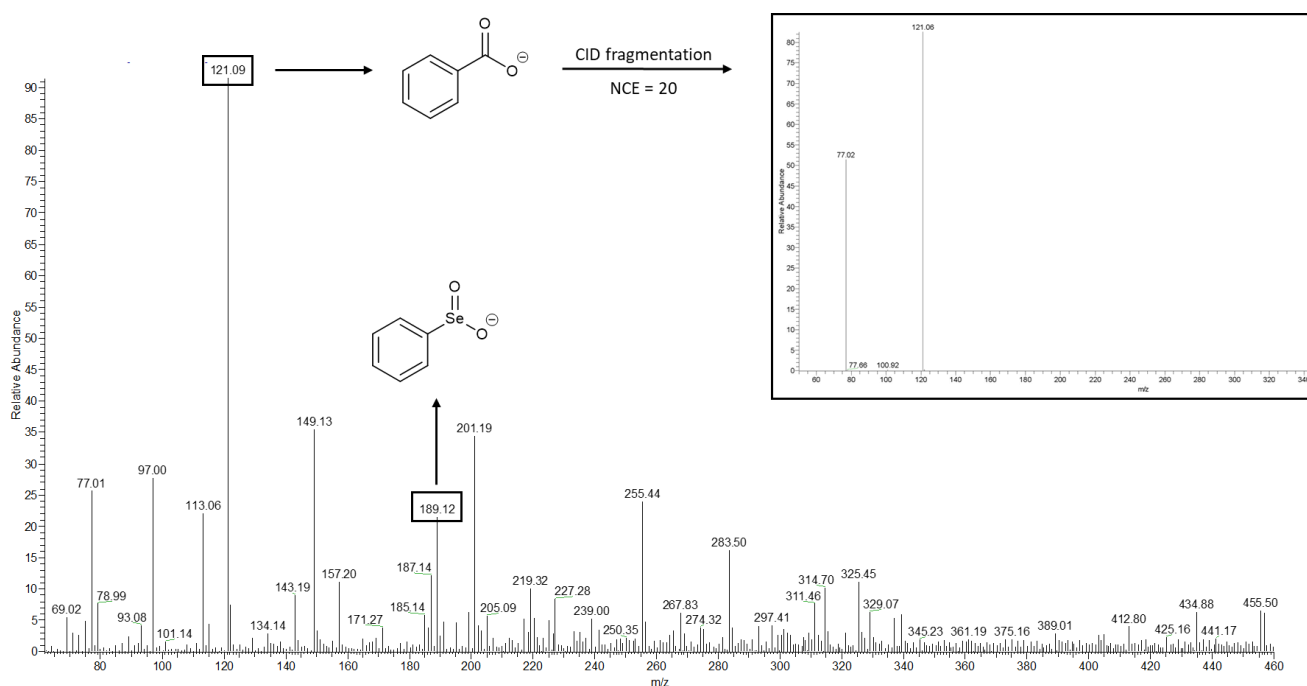

Figure S30. Negative ionization ESI-MS spectra of the oxidation of compound **3**. The peak at 121.09 m/z correspond to benzoic acid (as confirmed by the Collision Induced Dissociation (CID) experiment at Normalized Collision Energy (NCE) = 20), the peak at 189.12 corresponds to the seleninic acid.

## Compound 1

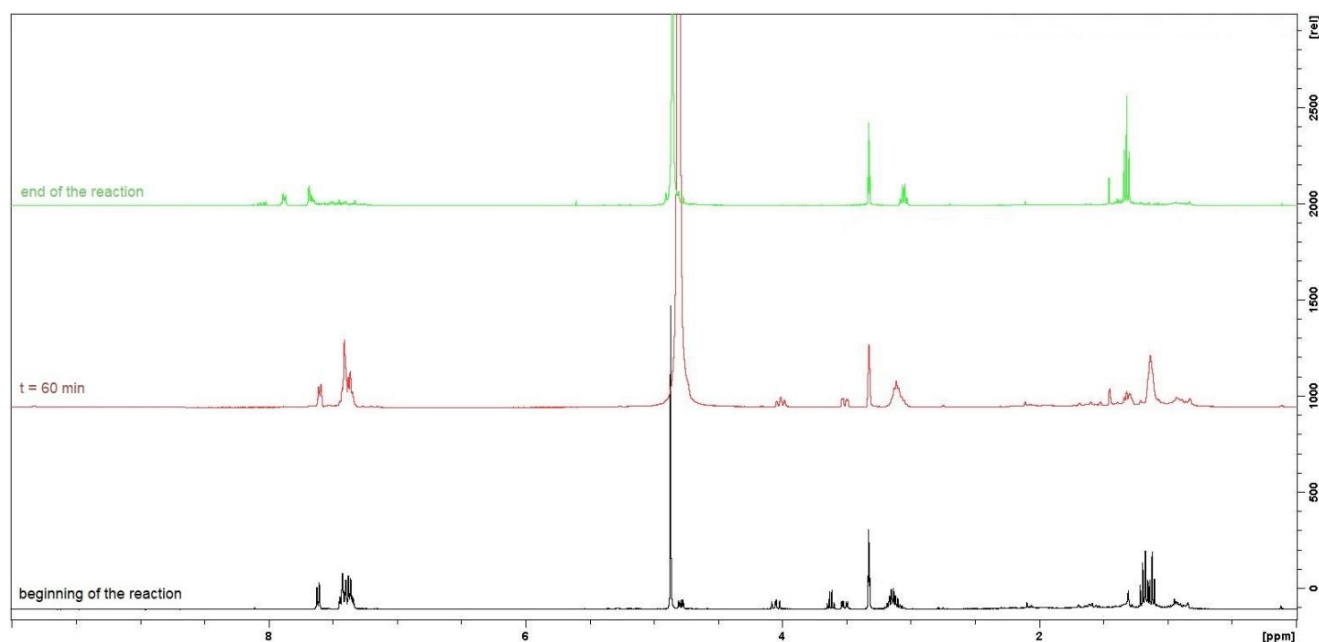

Figure S31.  $^1\text{H}$ -NMR spectra of compound **1** oxidation over time (• before the addition of  $\text{H}_2\text{O}_2$ , • after 60 minutes from the addition of  $\text{H}_2\text{O}_2$ , • overnight reaction).

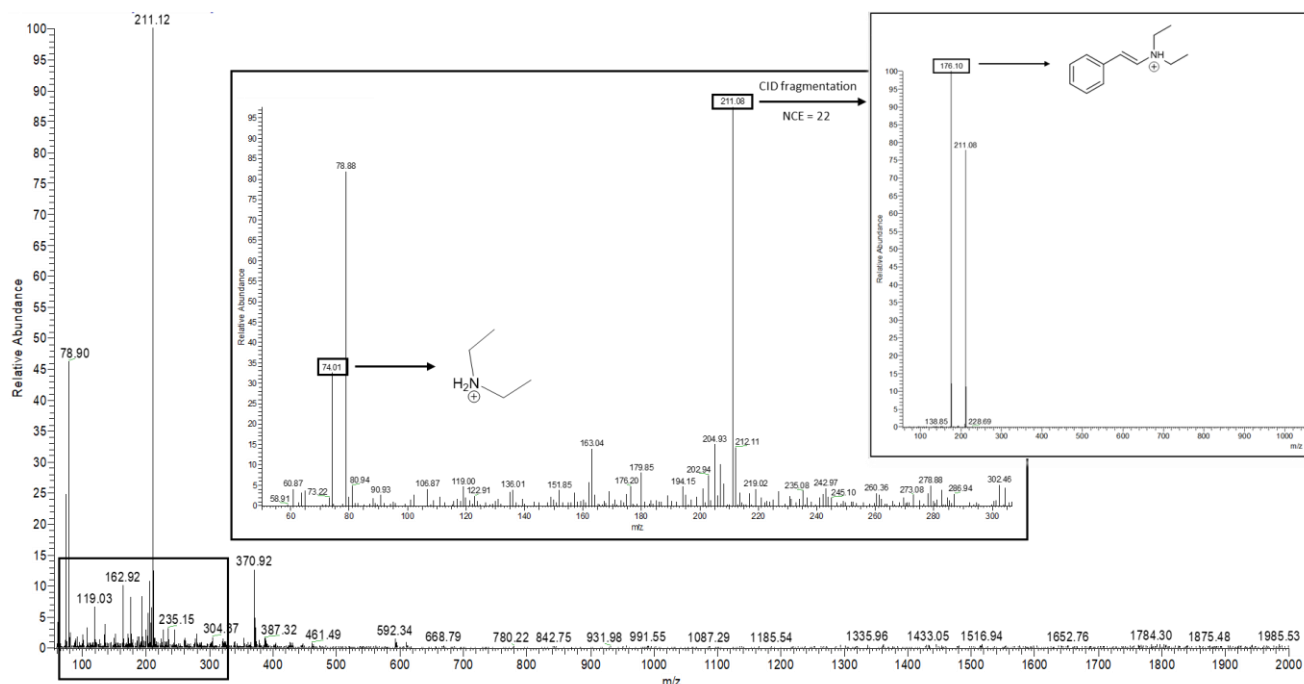

Figure S32. ESI-MS spectra of the oxidation after 60 minutes of compound **1**. Spectrum was acquired after dilution of the NMR sample ( $\text{MeOD}/\text{D}_2\text{O}$ , 85/15) in  $\text{MeOH}$ . The peak at 74.01  $m/z$  corresponds to the final product (*i.e.* diethylamine), the peak at 211.01  $m/z$  corresponds to the deuterated methanol adduct of the enamine as confirmed by the Collision Induced Dissociation (CID) spectrum registered at Normalized Collision Energy (NCE) = 22.

## Compound 5

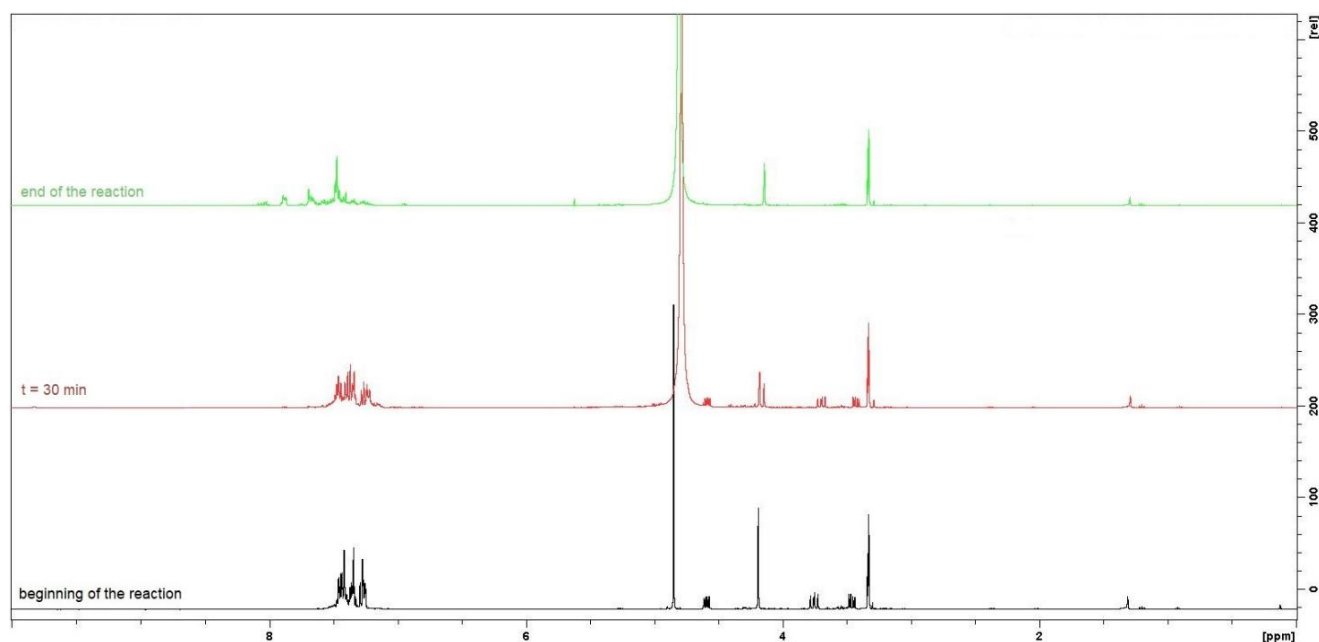

Figure S33.  $^1\text{H}$ -NMR spectra of compound **5** oxidation over time (• before the addition of  $\text{H}_2\text{O}_2$ , • after 30 minutes from the addition of  $\text{H}_2\text{O}_2$ , • overnight reaction).

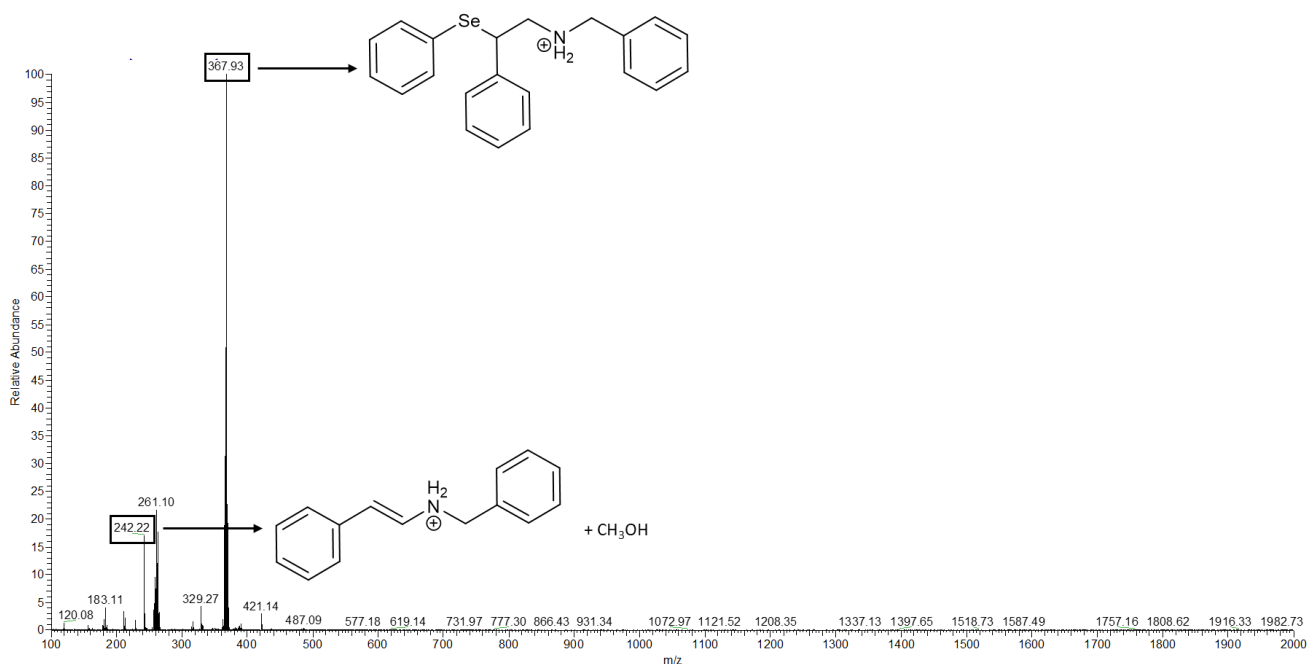

Figure S34. ESI-MS spectra of the oxidation after 30 minutes of compound **5**. Spectrum was acquired after dilution of the NMR sample (MeOD/ $\text{D}_2\text{O}$ , 85/15) in MeOH. The peak at 242.22 m/z corresponds to the methanol adduct of the enamine, the peak at 367.93 corresponds to the starting material.

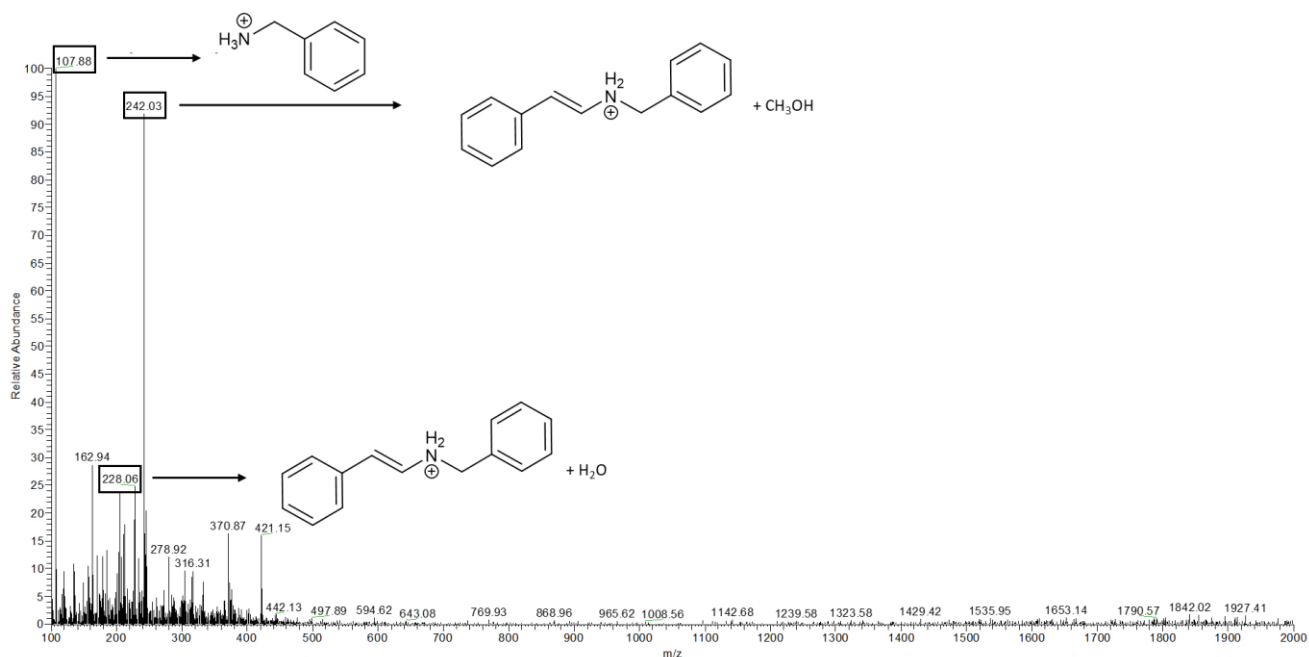

Figure S35. ESI-MS spectra of the oxidation after 60 minutes of compound **5**. Spectrum was acquired after dilution of the NMR sample (MeOD/D<sub>2</sub>O, 85/15) in MeOH. The peak at 107.88 m/z corresponds to the final product (*i.e.* benzylamine), the peaks at 228.06 and 242.03 m/z correspond respectively to the methanol and water adduct of the enamine.

### Compound **7**

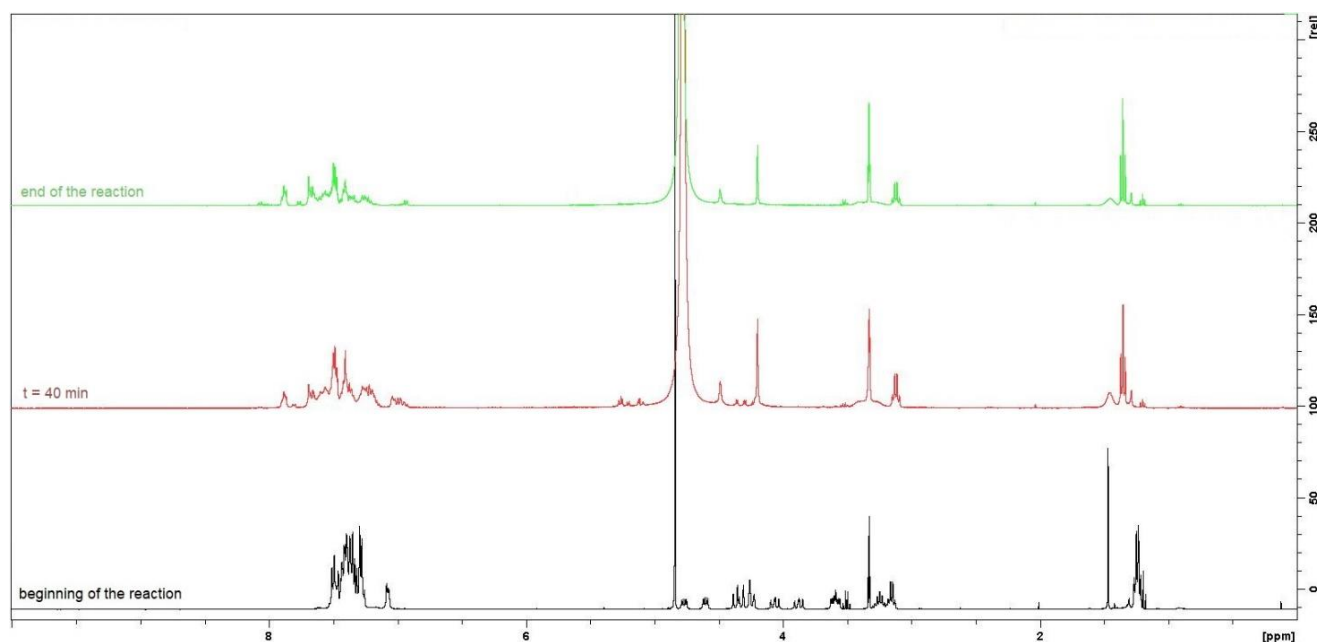

Figure S36. <sup>1</sup>H-NMR spectra of compound **7** oxidation over time (• before the addition of H<sub>2</sub>O<sub>2</sub>, • after 30 minutes from the addition of H<sub>2</sub>O<sub>2</sub>, • overnight reaction).

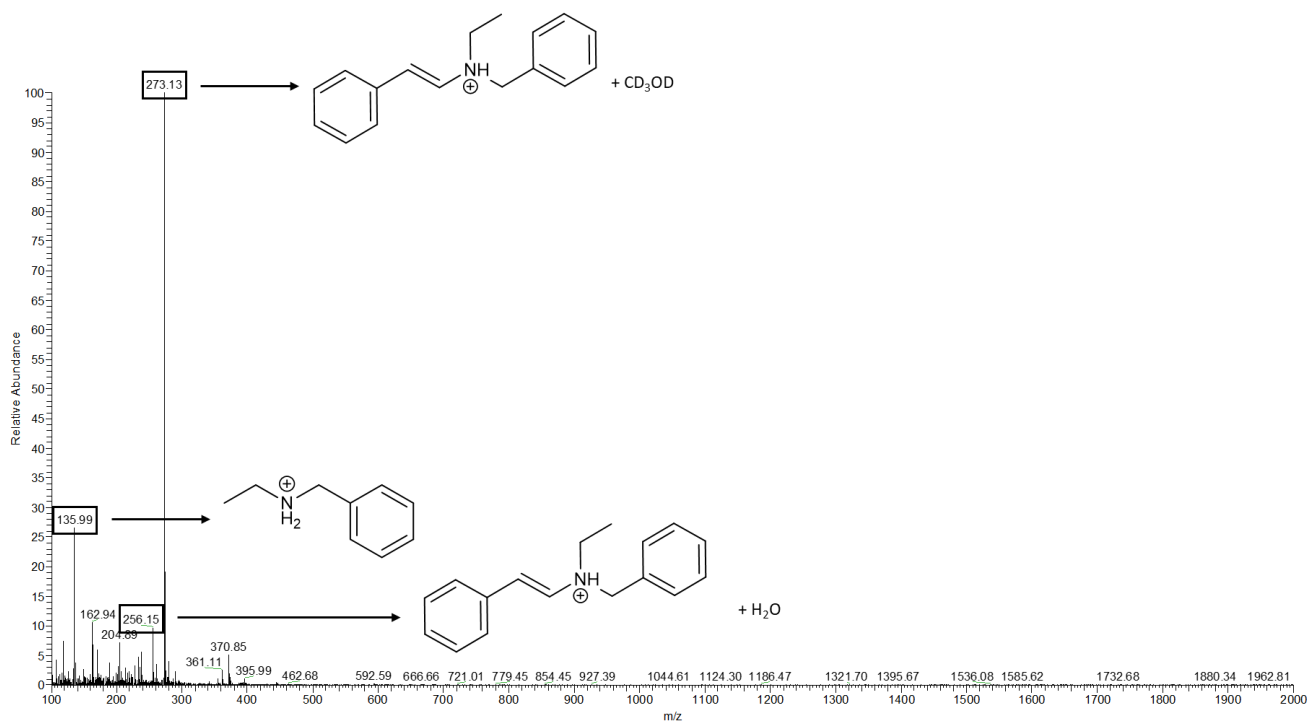

Figure S37. ESI-MS spectra of the oxidation of compound 7. Spectrum was acquired after dilution of the NMR sample (MeOD/D<sub>2</sub>O, 85/15) in MeOH. The peak at 135.99 m/z corresponds to the final product (*i.e.* N-ethylbenzylamine), the peaks at 256.15 and 273.13 m/z correspond respectively to the deuterated methanol and water adduct of the enamine.

## <sup>1</sup>H-NMR, <sup>13</sup>C-NMR and ESI-MS spectra of the isolated compounds obtained by oxidation with H<sub>2</sub>O<sub>2</sub>

### Diethylamine·HCl

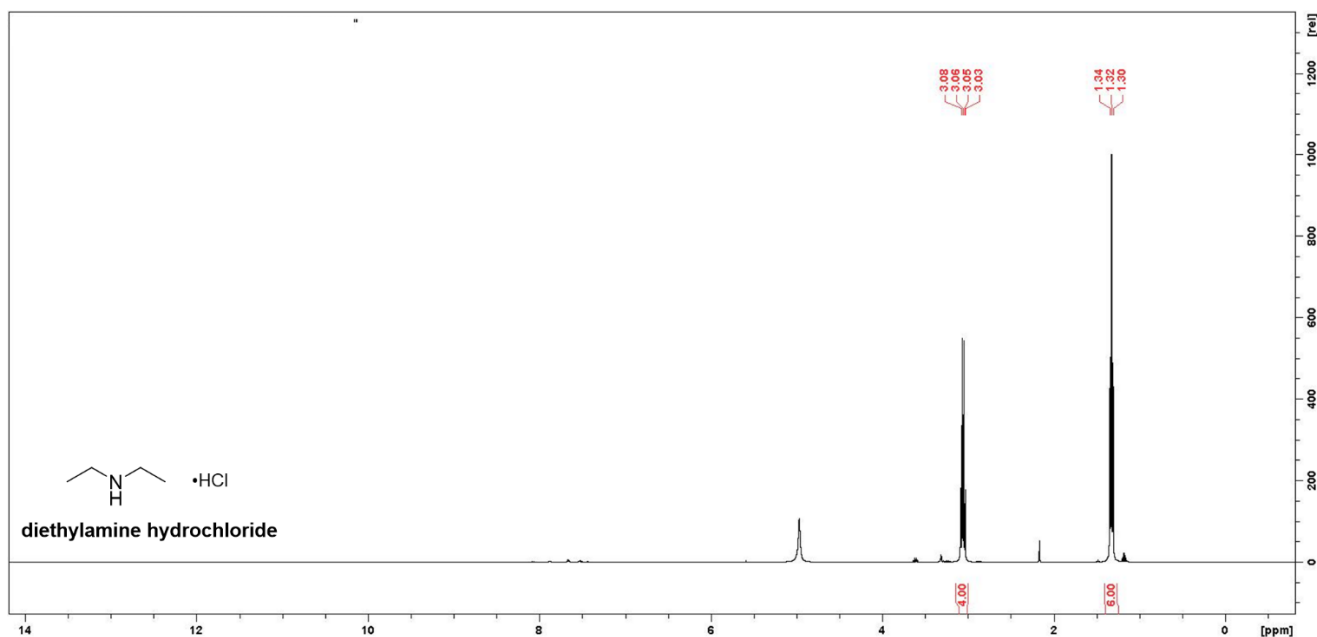

Figure S38.  $^1\text{H}$ -NMR spectrum of the final product of the oxidation of compound **1**, *i.e.* diethylamine hydrochloride.

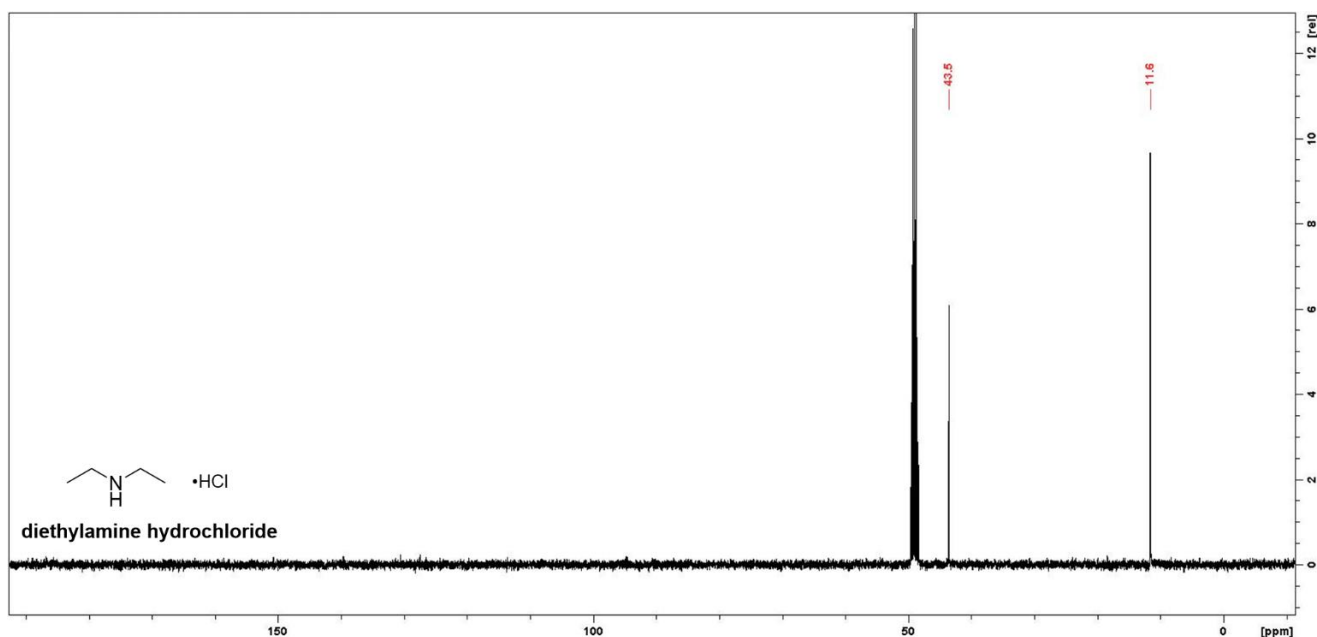

Figure S39.  $^{13}\text{C}$ -NMR spectrum of the final product of the oxidation of compound **1**, *i.e.* diethylamine hydrochloride.

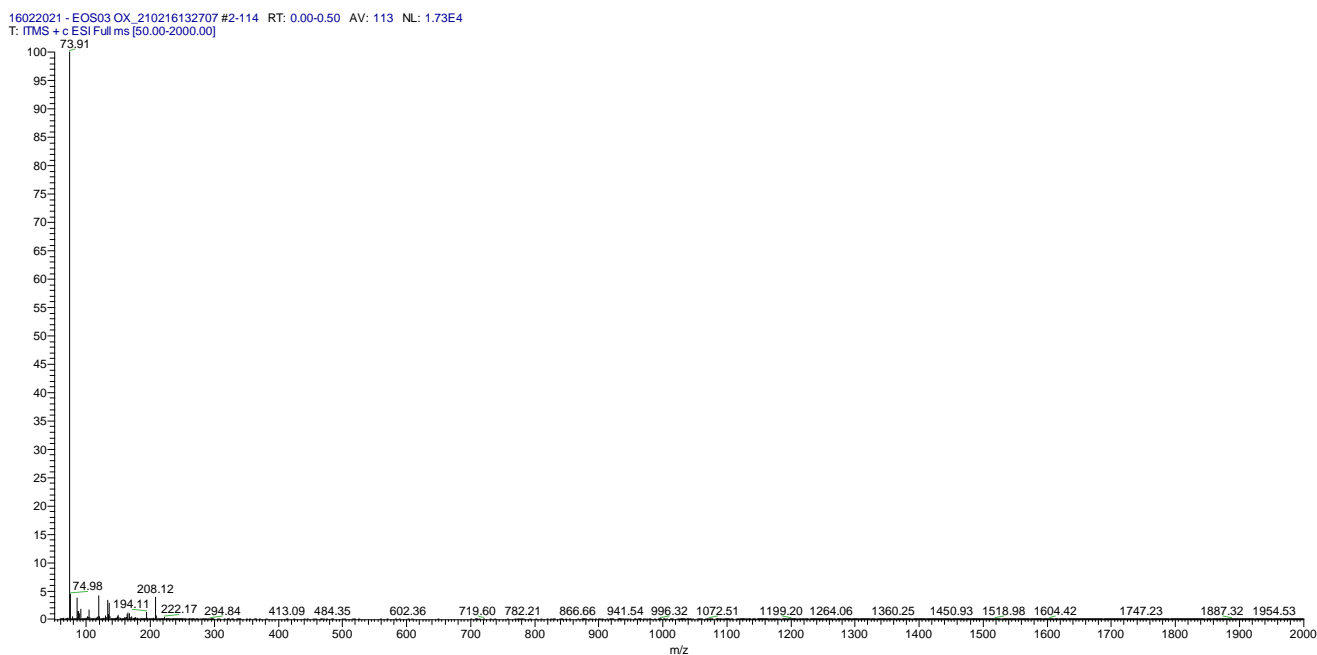

Figure S40. ESI-MS spectrum of the final product of the oxidation of compound **1**, *i.e.* diethylamine hydrochloride.

*Dibenzylamine*•HCl

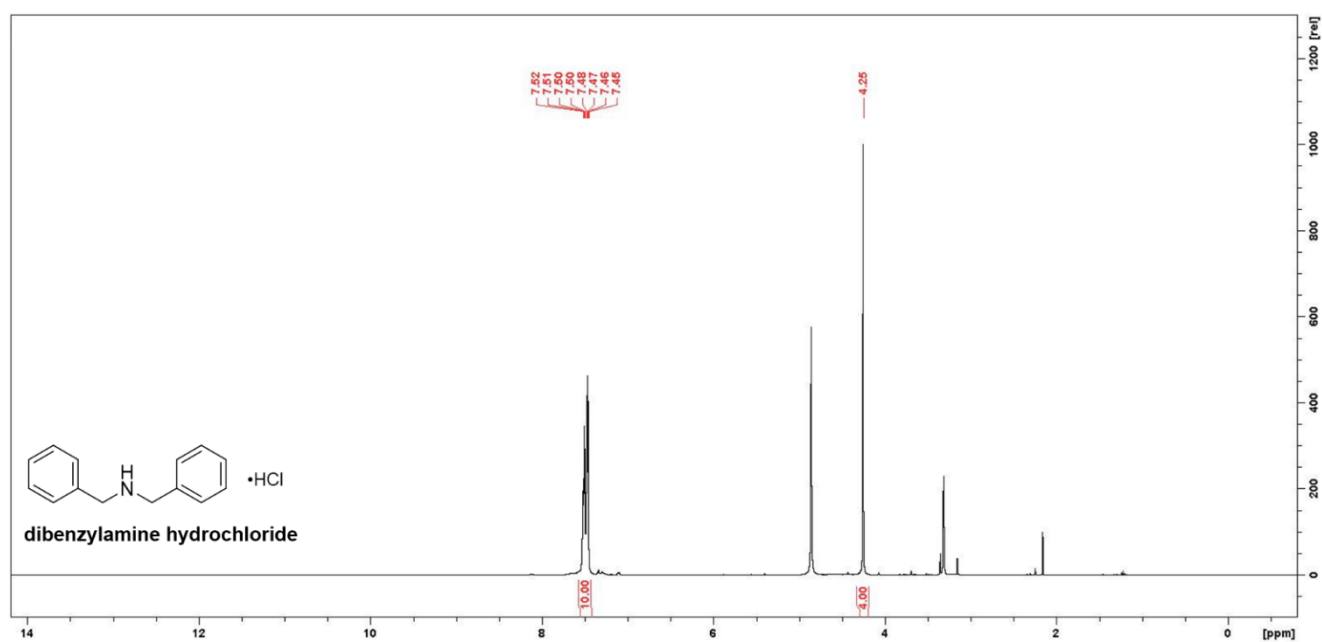

Figure S41.  $^1\text{H}$ -NMR spectrum of the final product of the oxidation of compound **2**, *i.e.* dibenzylamine hydrochloride.

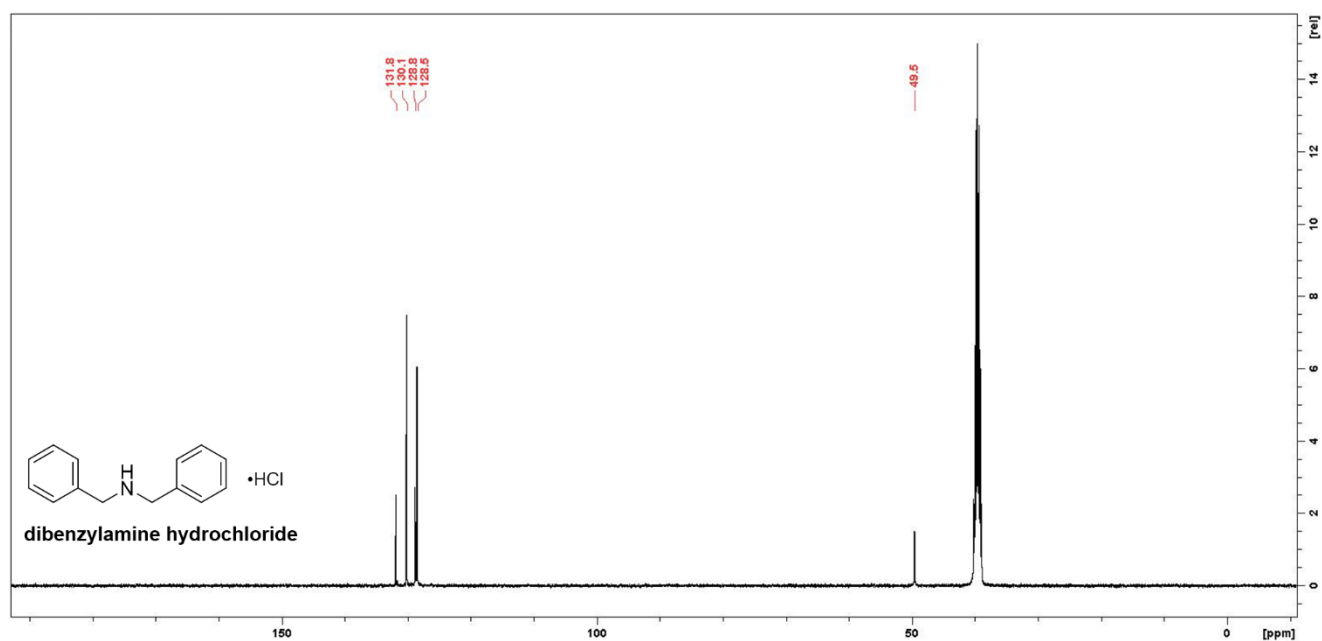

Figure S42.  $^{13}\text{C}$ -NMR spectrum of the final product of the oxidation of compound **2**, *i.e.* dibenzylamine hydrochloride.

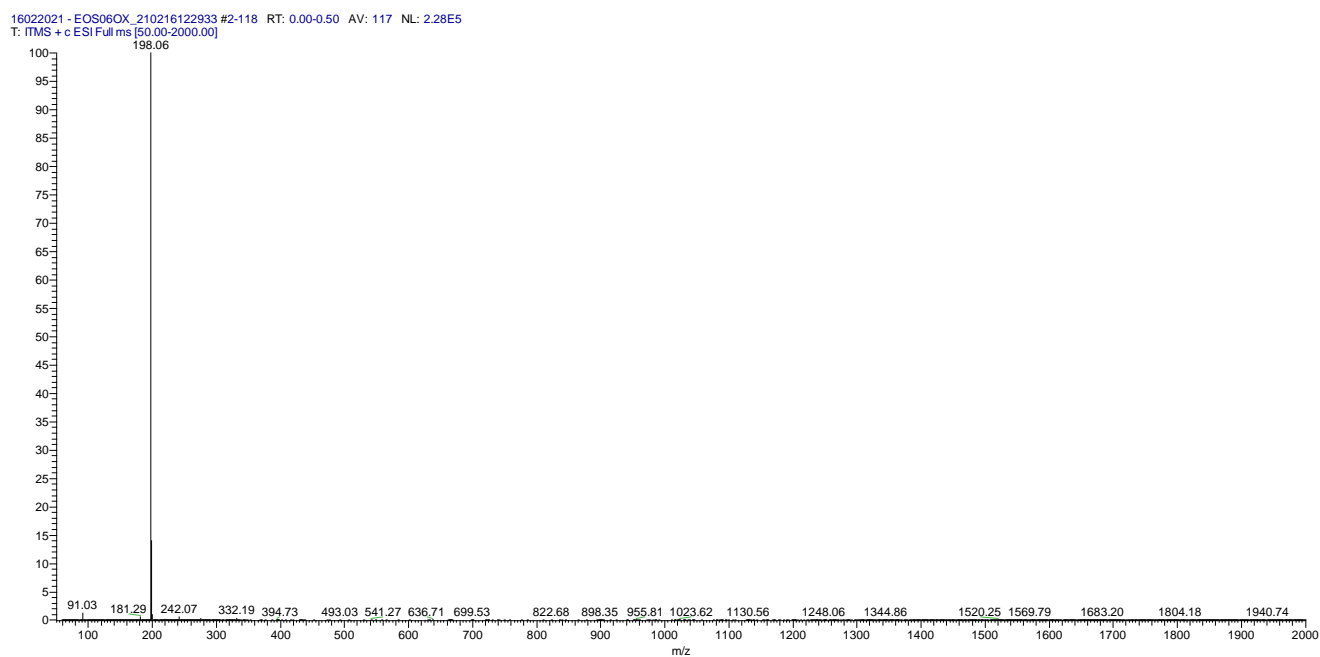

Figure S43. ESI-MS spectrum of the final product of the oxidation of compound **2**, *i.e.* dibenzylamine hydrochloride.



Morpholine•HCl

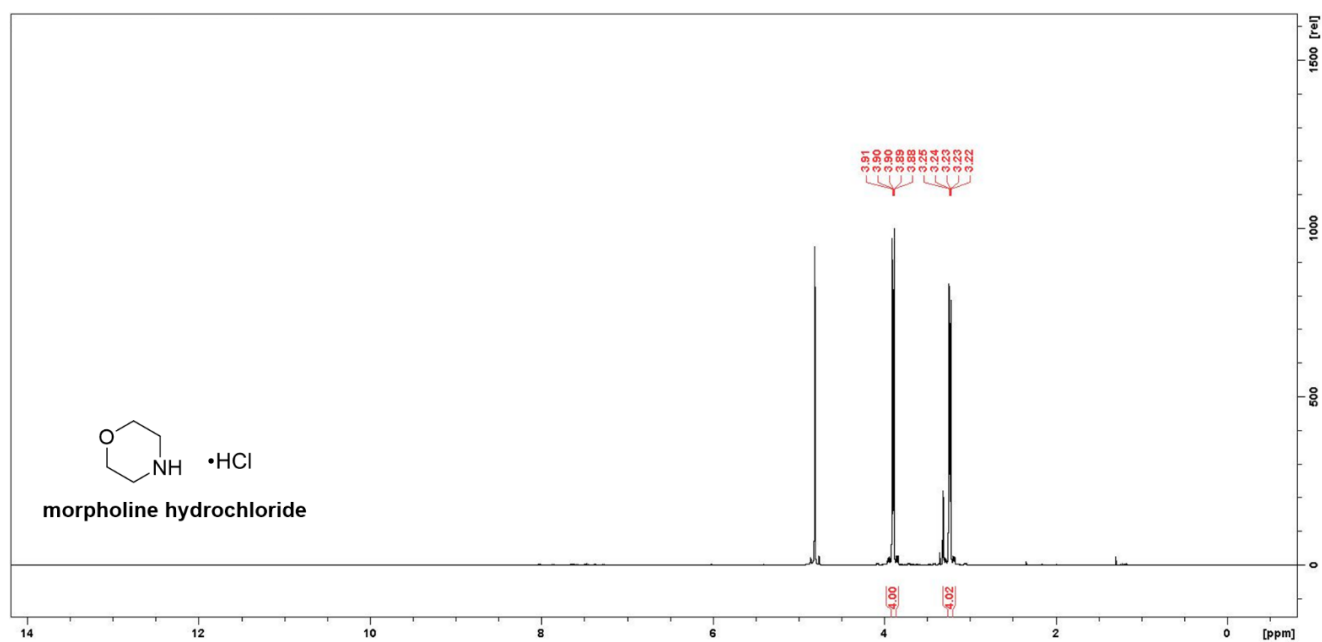

Figure S44. <sup>1</sup>H-NMR spectrum of the final product of the oxidation of compound **3**, *i.e.* morpholine hydrochloride.

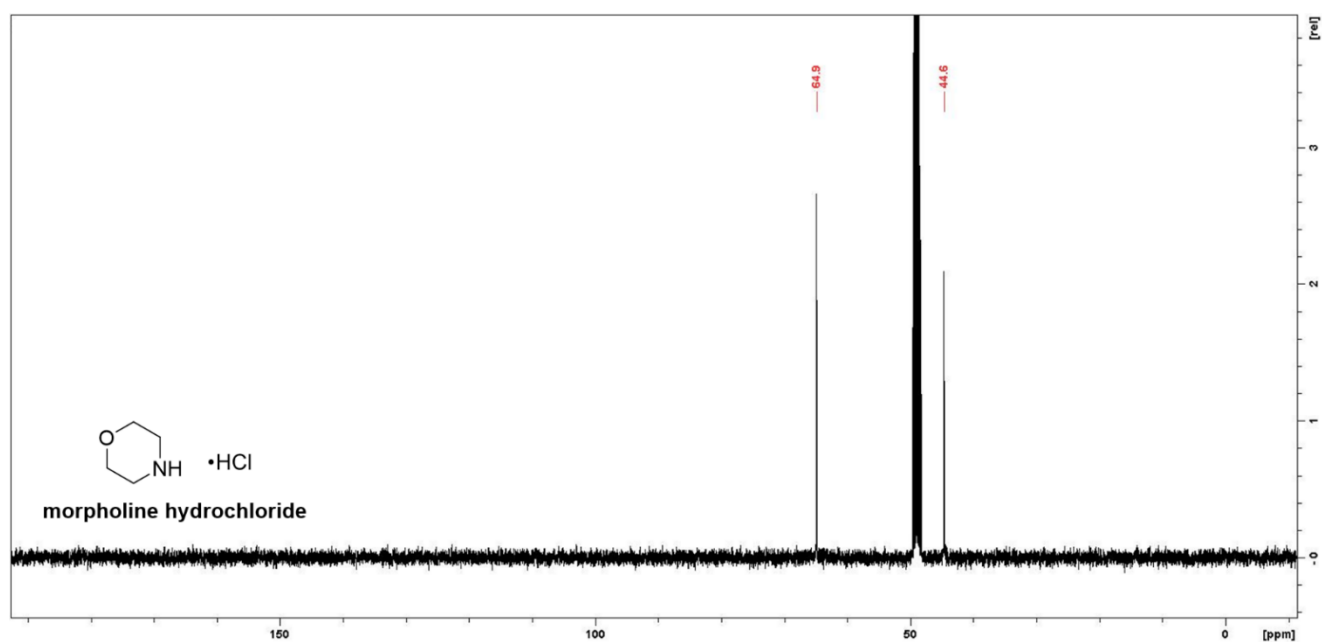

Figure S45. <sup>13</sup>C-NMR spectrum of the final product of the oxidation of compound **3**, *i.e.* morpholine hydrochloride.

16022021 - EA13OX\_210216132707 #2-114 RT: 0.00-0.50 AV: 113 NL: 4.34E4  
T: ITMS + c ESI Full ms [50.00-2000.00]

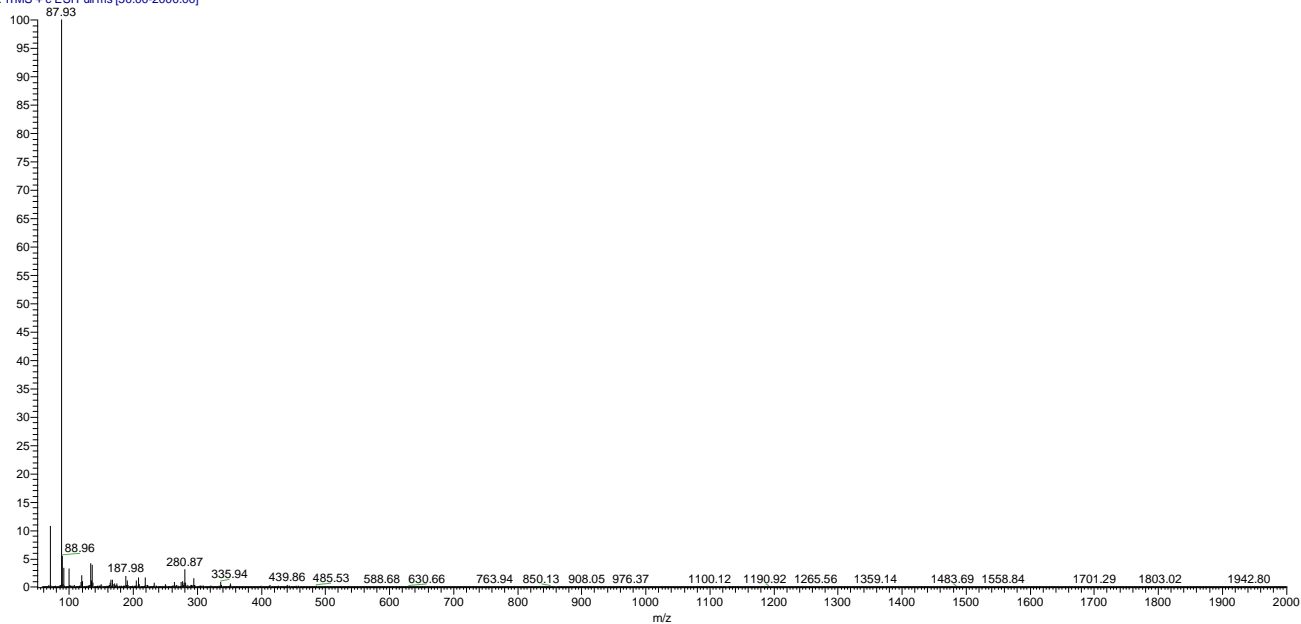

Figure S46. ESI-MS spectrum of the final product of the oxidation of compound **3**, *i.e.* morpholine hydrochloride.

#### Isoindoline•HCl

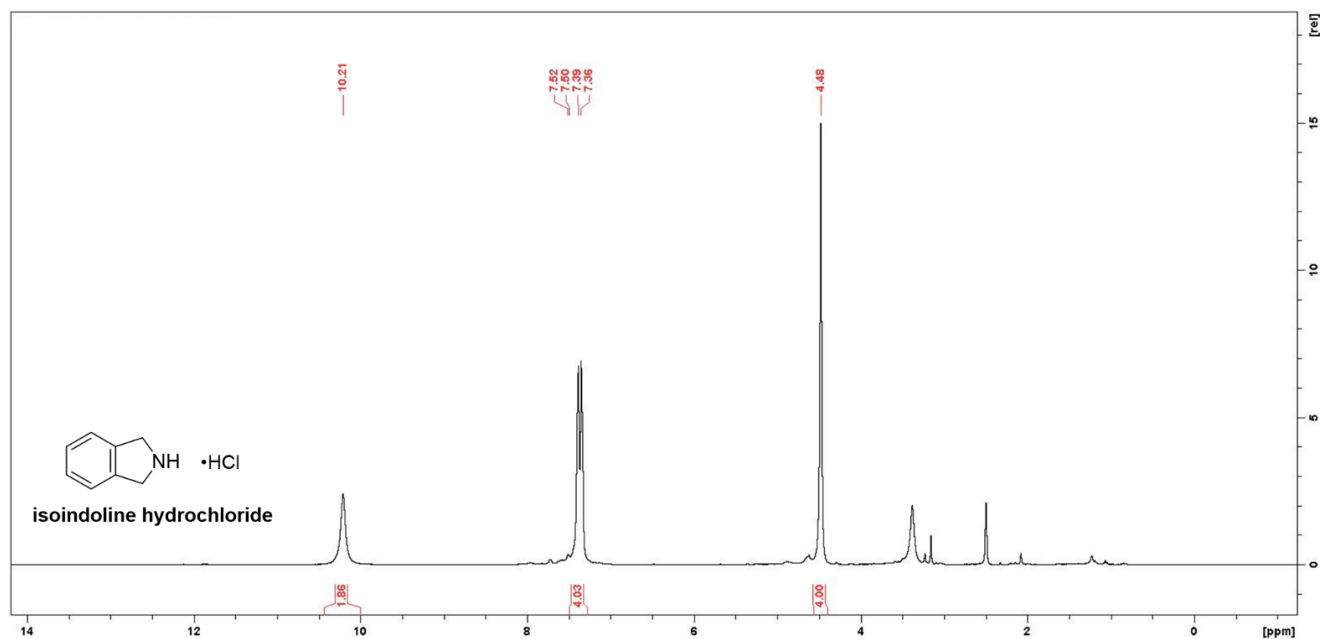

Figure S47. <sup>1</sup>H-NMR spectrum of the final product of the oxidation of compound **4**, *i.e.* isoindoline hydrochloride.

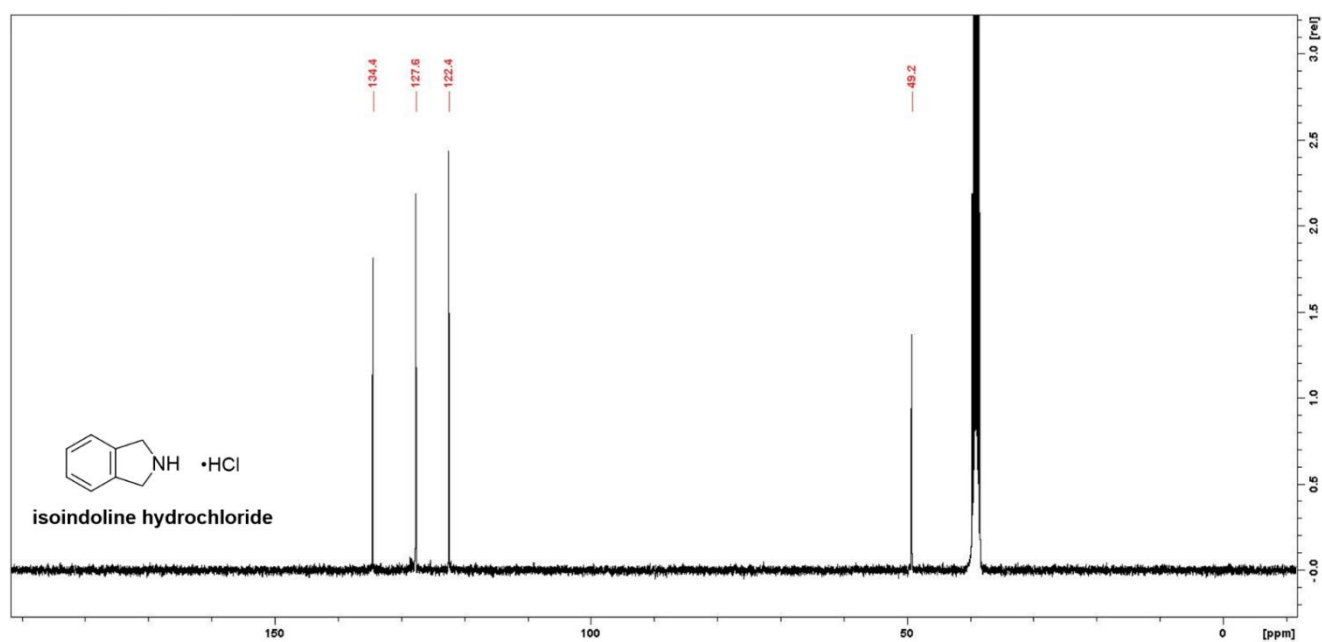

Figure S48.  $^{13}\text{C}$ -NMR spectrum of the final product of the oxidation of compound **4**, *i.e.* isoindoline hydrochloride.

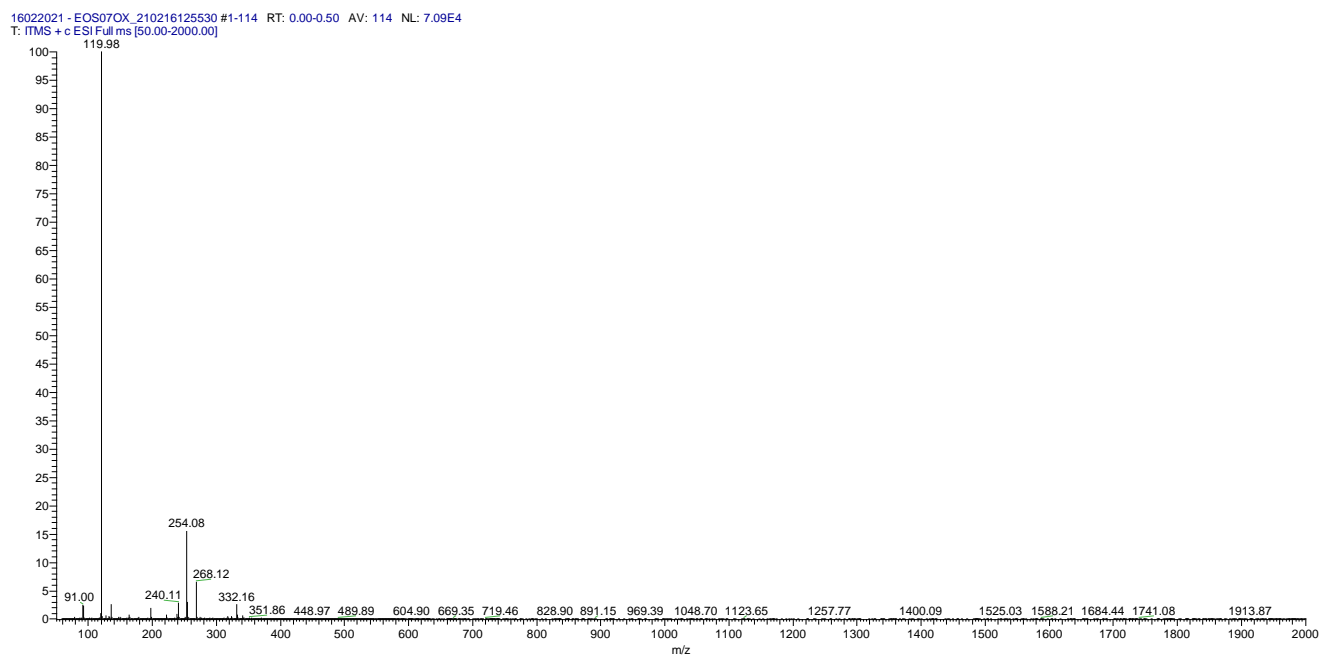

Figure S49. ESI-MS spectrum of the final product of the oxidation of compound **4**, *i.e.* isoindoline hydrochloride.

**Benzylamine•HCl**

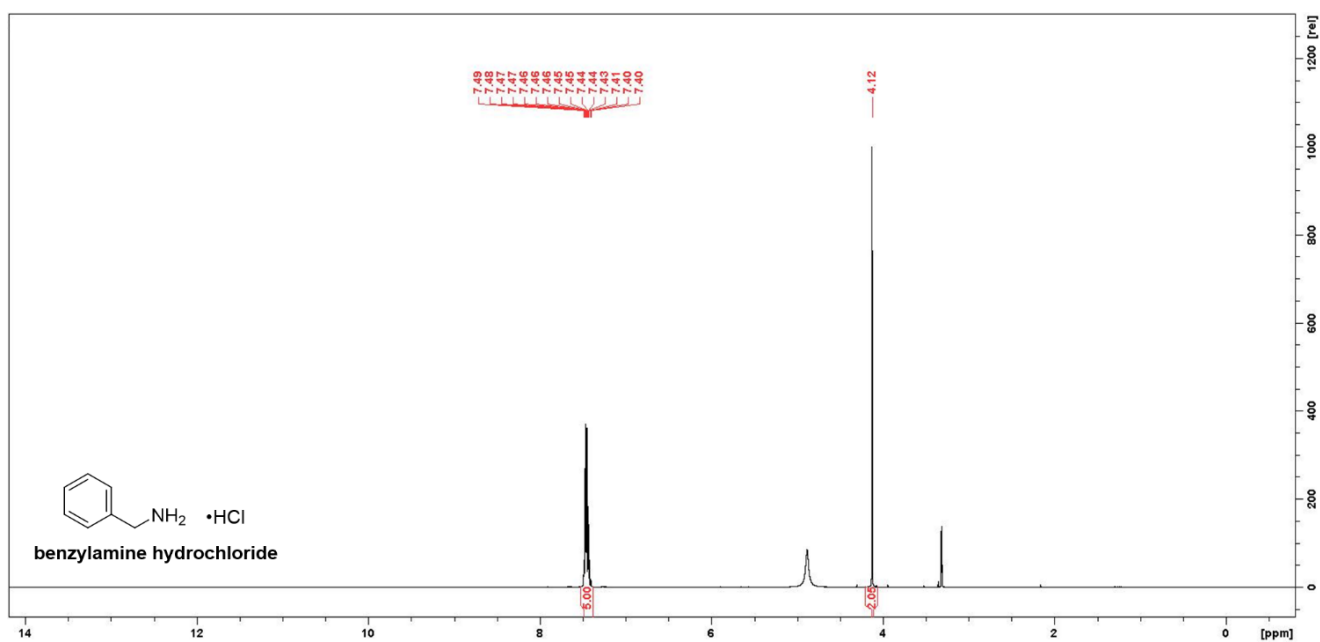

Figure S50. <sup>1</sup>H-NMR spectrum of the final product of the oxidation of compound **5**, *i.e.* benzylamine hydrochloride.

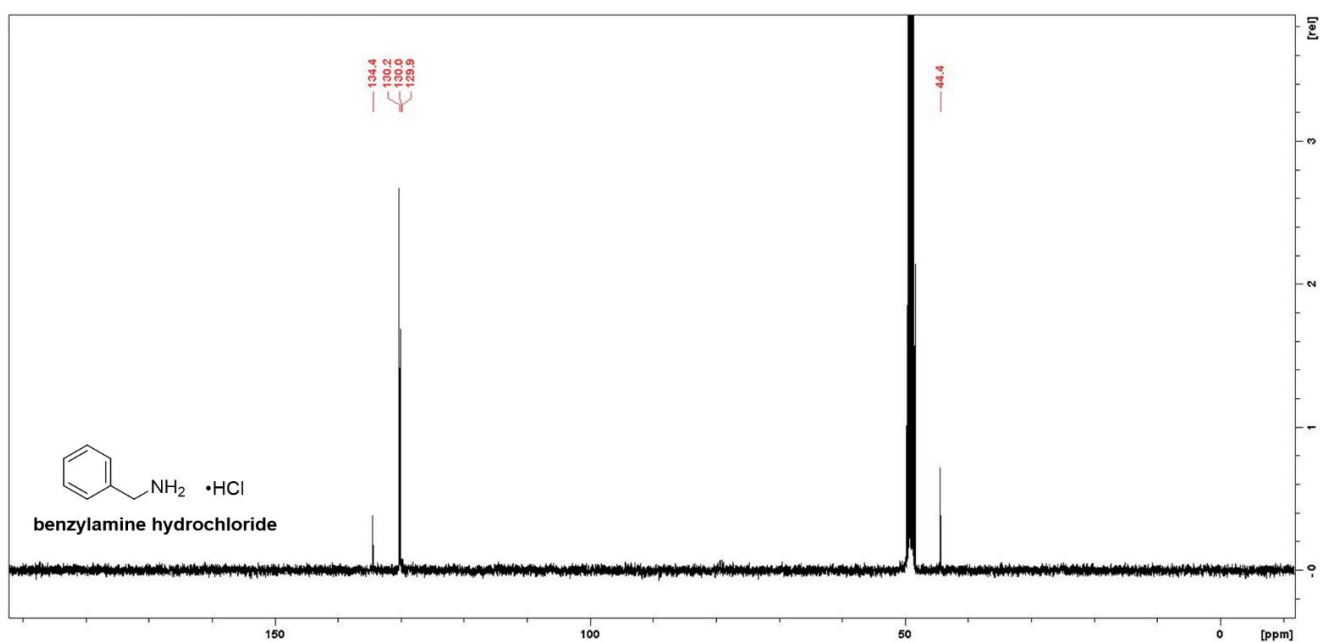

Figure S51. <sup>13</sup>C-NMR spectrum of the final product of the oxidation of compound **5**, *i.e.* benzylamine hydrochloride.

16022021 - EOS05OX\_210216132707 #3-115 RT: 0.01-0.50 AV: 113 NL: 3.18E4  
T: ITMS + c ESI Full ms [50.00-2000.00]

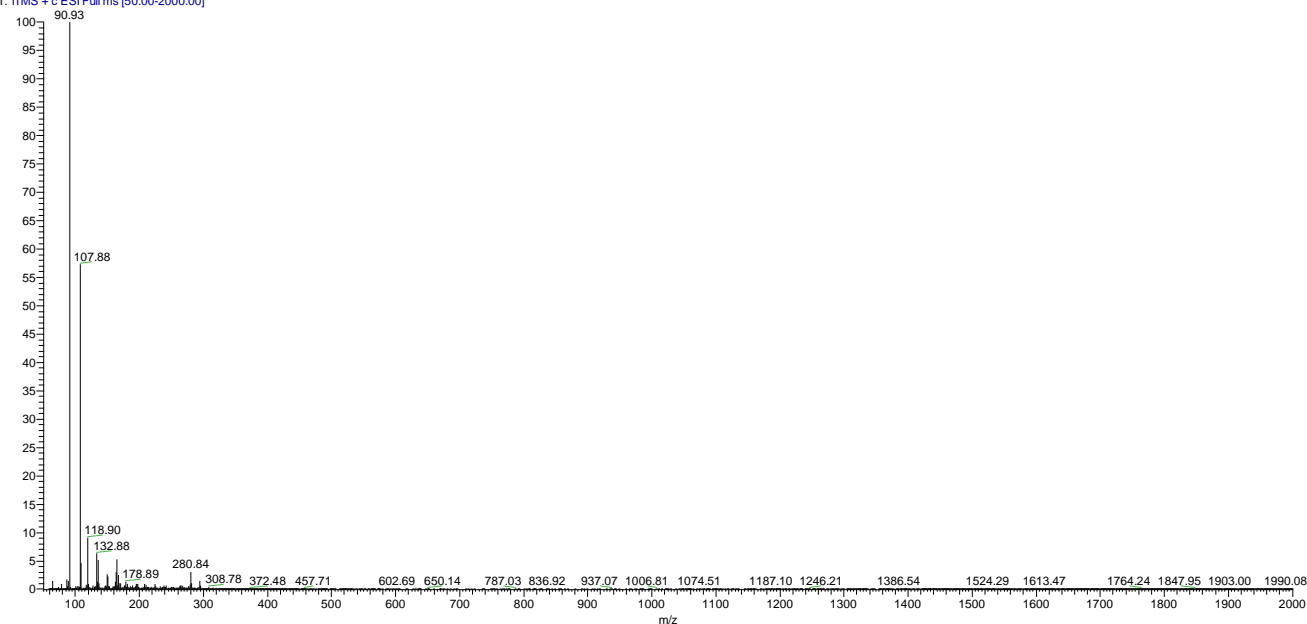

Figure S52. ESI-MS spectrum of the final product of the oxidation of compound **5**, *i.e.* benzylamine hydrochloride.

*p*-nitrobenzylamine•HCl

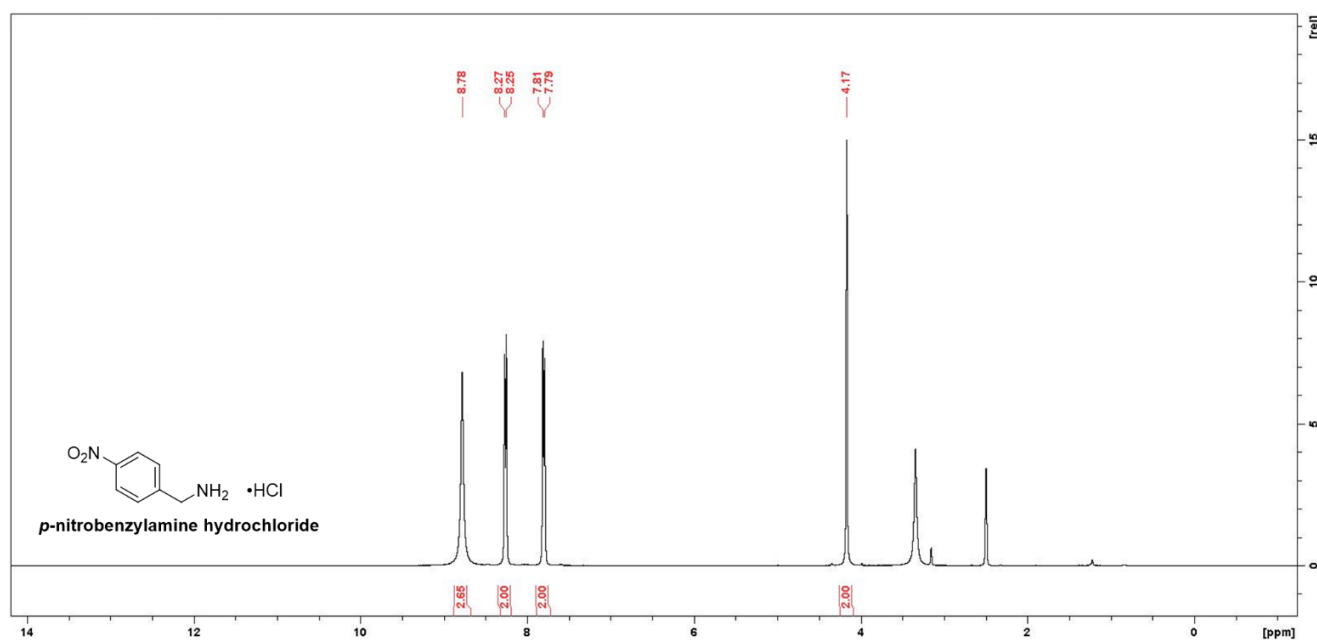

Figure S53.  $^1\text{H}$ -NMR spectrum of the final product of the oxidation of compound **6**, *i.e.* *p*-nitrobenzylamine hydrochloride.

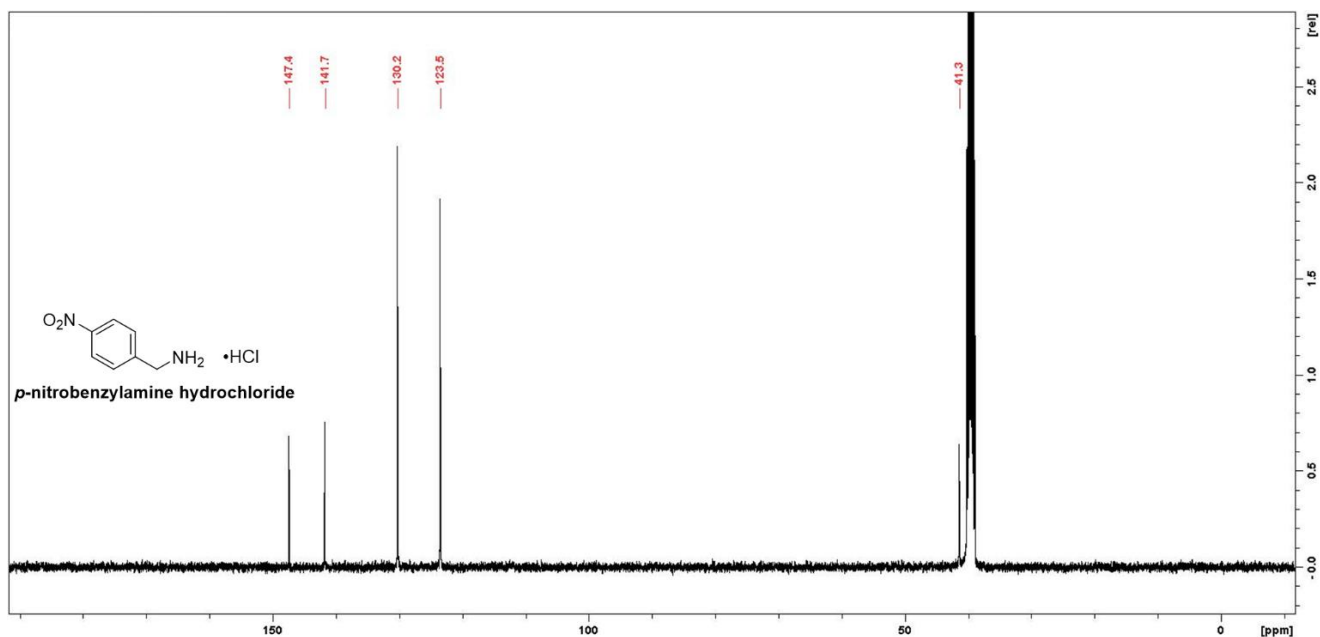

Figure S54. <sup>13</sup>C-NMR spectrum of the final product of the oxidation of compound **6**, *i.e.* *p*-nitrobenzylamine hydrochloride.

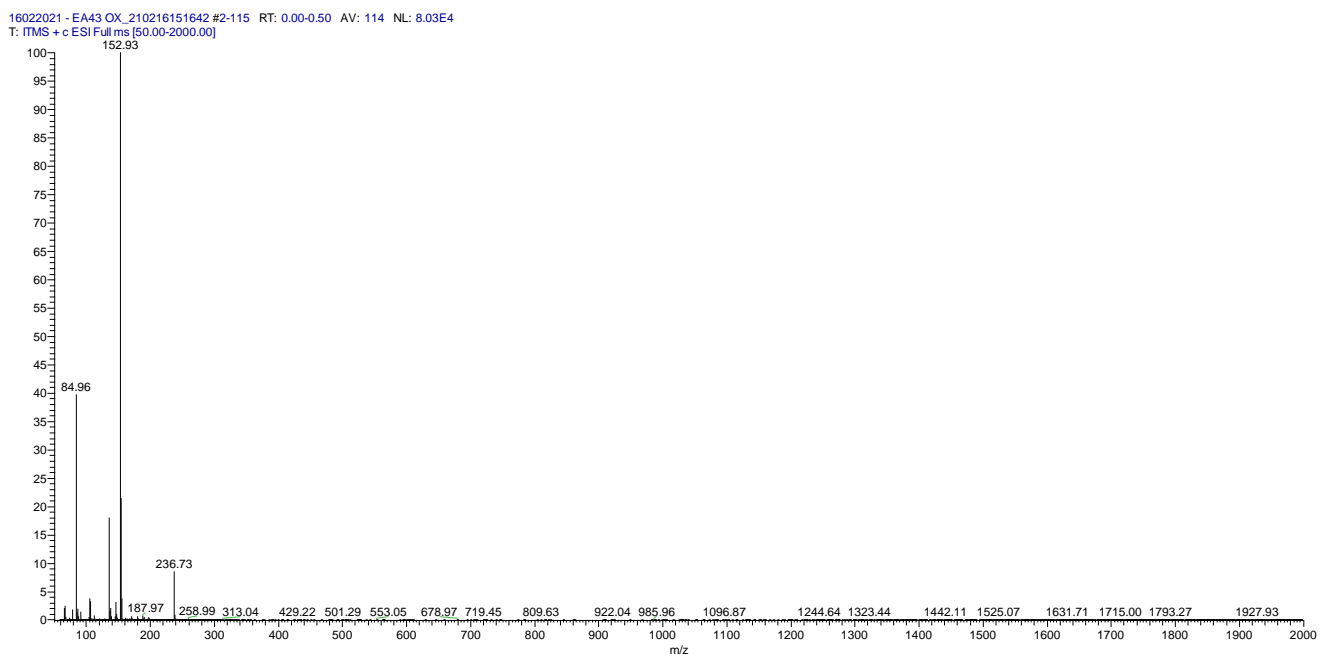

Figure S55. ESI-MS spectrum of the final product of the oxidation of compound **6**, *i.e.* *p*-nitrobenzylamine hydrochloride.

*N*-ethylbenzylamine•HCl

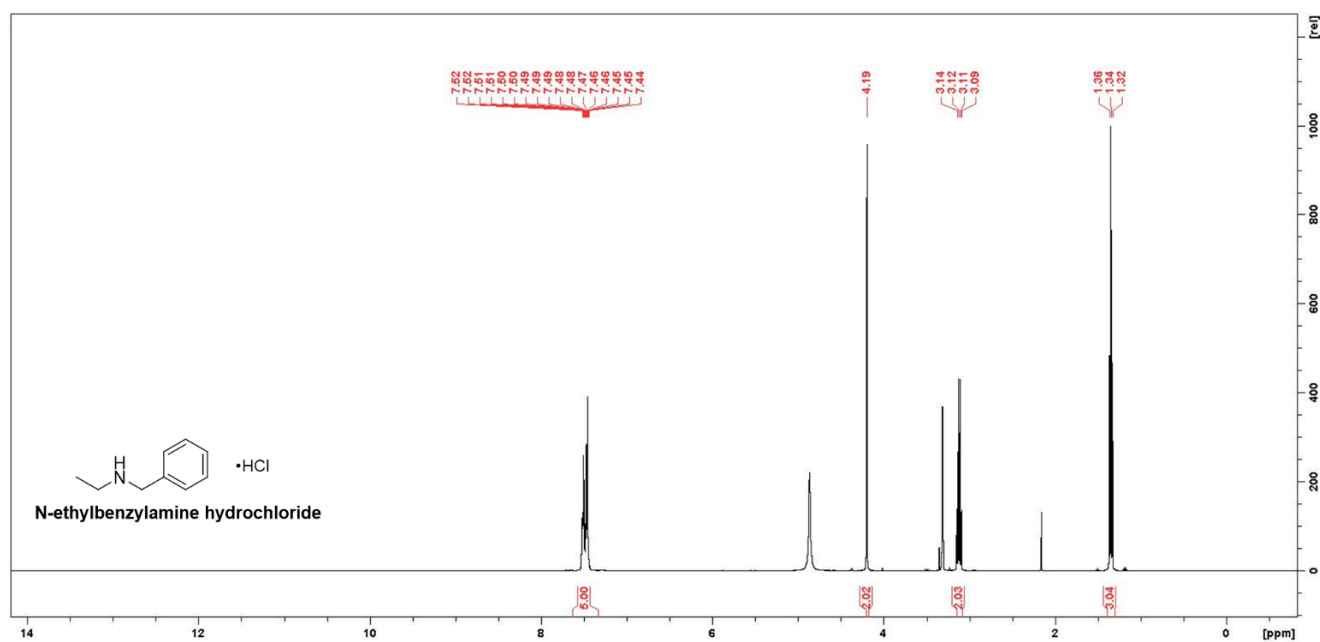

Figure S56. <sup>1</sup>H-NMR spectrum of the final product of the oxidation of compound **7**, *i.e.* N-ethylbenzylamine hydrochloride.

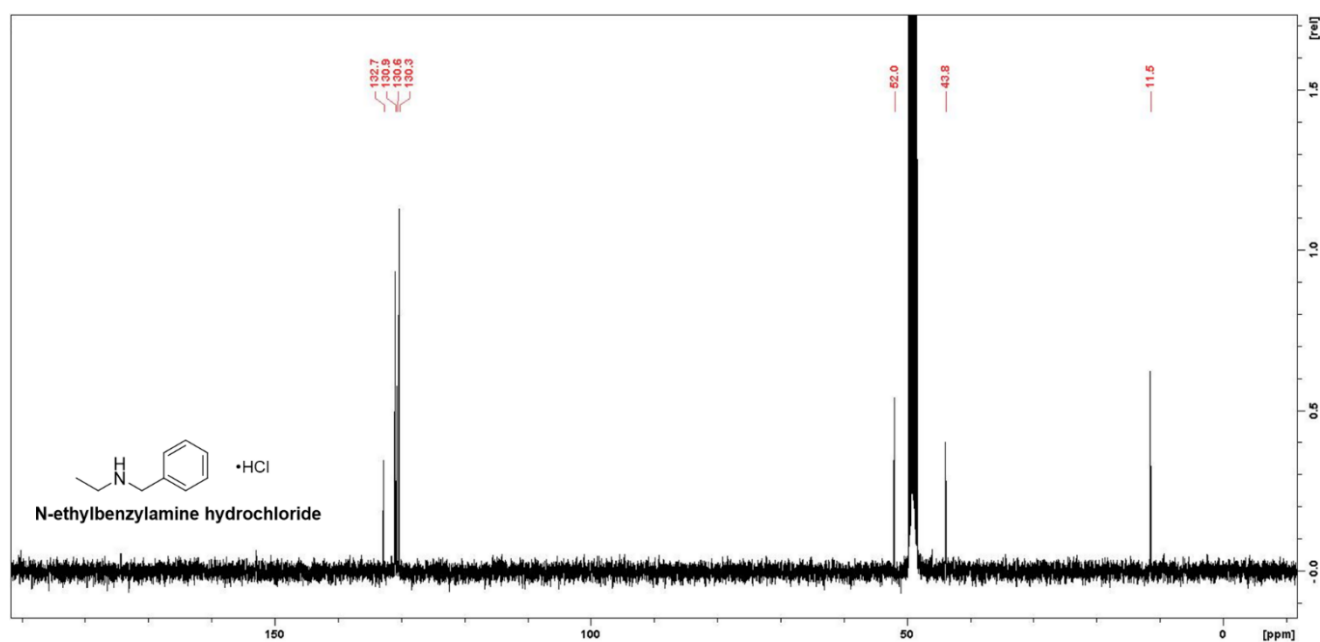

Figure S57. <sup>13</sup>C-NMR spectrum of the final product of the oxidation of compound **7**, *i.e.* N-ethylbenzylamine hydrochloride.

16022021 - EOS08OX\_210216122933 #2-115 RT: 0.00-0.50 AV: 114 NL: 1.05E5  
T: ITMS + c ESI Full ms [50.00-2000.00]

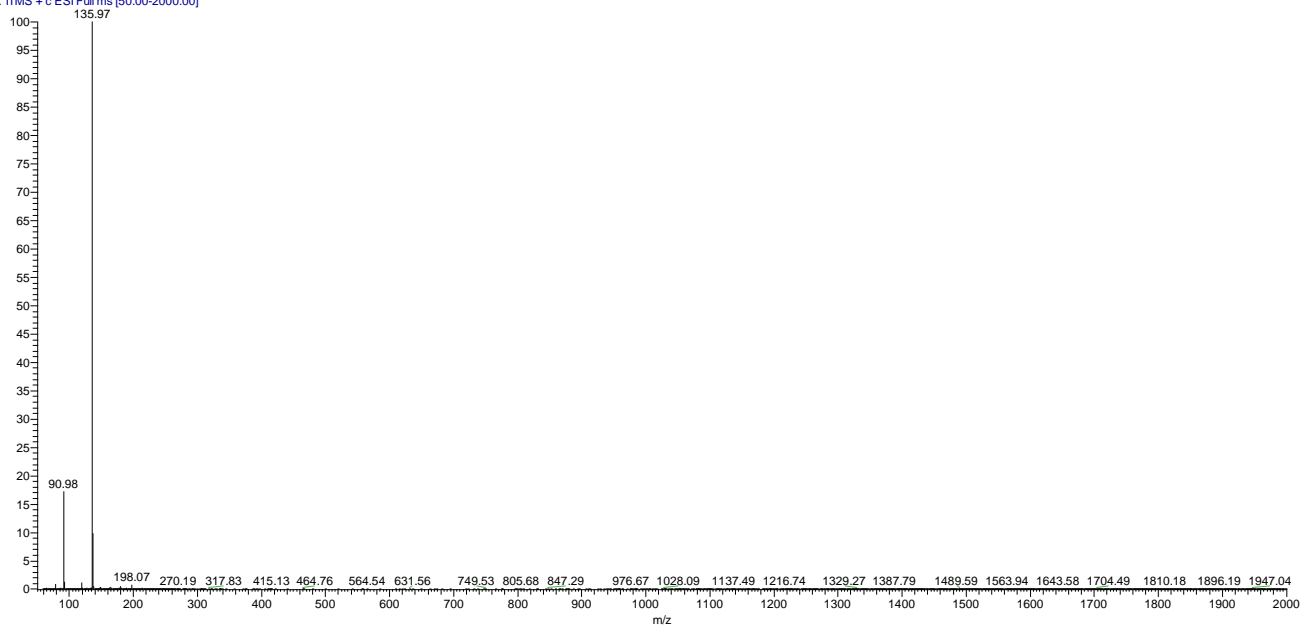

Figure S58. ESI-MS spectrum of the final product of the oxidation of compound **7**, *i.e.* N-ethylbenzylamine hydrochloride.



Table S1. Gibbs free energies relative to free reactants for the selenoxide-triggered amine formation. See Scheme 1 and Figure 1 in the main text for the definition of the structures.

|    |                                   | $\Delta G$ (kcal mol <sup>-1</sup> ) |       |
|----|-----------------------------------|--------------------------------------|-------|
|    |                                   | Gas phase                            | Water |
| a) | 3 + H <sub>2</sub> O <sub>2</sub> | 0.0                                  | 0.0   |
|    | TSox                              | 25.0                                 | 14.5  |
|    | Iox                               | -34.1                                | -39.5 |
|    | TSelim                            | -29.3                                | -31.9 |
|    | SeOH + En                         | -73.5                                | -76.7 |
| b) | En + H <sub>2</sub> O             | 0.0                                  | 0.0   |
|    | TS1                               | 50.3                                 | 51.8  |
|    | I                                 | 19.1                                 | 25.5  |
|    | TS2                               | -                                    | -     |
|    | P                                 | 8.8                                  | -6.4  |

Table S2 Geometries of the optimized structures of the selenoxide-triggered amine formation reaction. Level of theory ZORA-OLYP/TZ2P

|                               |              |              |              |   |              |              |              |
|-------------------------------|--------------|--------------|--------------|---|--------------|--------------|--------------|
| H <sub>2</sub> O              |              |              |              | C | -1.555801000 | -1.222874000 | -0.354902000 |
| Energy= -0.51495479 Ha        |              |              |              | C | -1.755219000 | 0.268484000  | -0.309006000 |
| nimag = 0                     |              |              |              | C | -2.273080000 | 0.992546000  | -1.394733000 |
| O                             | 0.000000000  | 0.000000000  | -0.727963000 | C | -2.468985000 | 2.367534000  | -1.311732000 |
| H                             | 0.000000000  | 0.760345000  | -0.133368000 | C | -2.142982000 | 3.058192000  | -0.142262000 |
| H                             | 0.000000000  | -0.760345000 | -0.133368000 | C | -1.616861000 | 2.356356000  | 0.939654000  |
| H <sub>2</sub> O <sub>2</sub> |              |              |              | C | -1.424903000 | 0.977090000  | 0.854203000  |
| Energy= -0.65281998Ha         |              |              |              | H | -1.017044000 | 0.441560000  | 1.707784000  |
| nimag = 0                     |              |              |              | H | -1.352172000 | 2.880821000  | 1.854713000  |
| O                             | -0.015407000 | -0.730641000 | -0.690438000 | H | -2.292840000 | 4.133110000  | -0.080084000 |
| O                             | 0.015407000  | 0.730641000  | -0.690438000 | H | -2.872935000 | 2.905607000  | -2.166156000 |
| H                             | 0.800760000  | 0.883499000  | -0.140076000 | H | -2.511747000 | 0.478921000  | -2.321547000 |
| H                             | -0.800760000 | -0.883499000 | -0.140076000 | C | -2.804225000 | -2.095260000 | -0.628536000 |
| 3                             |              |              |              | N | -3.706661000 | -2.185364000 | 0.514549000  |
| Energy= -9.0342064 Ha         |              |              |              | C | -4.778444000 | -1.204307000 | 0.576835000  |
| nimag = 0                     |              |              |              | H | -5.577529000 | -1.410324000 | -0.162976000 |
| C                             | 3.761185000  | 0.189889000  | -0.050204000 | H | -4.388971000 | -0.213141000 | 0.344112000  |
| C                             | 3.098155000  | 0.767895000  | -1.131872000 | H | -3.324488000 | -1.753522000 | -1.538586000 |
| C                             | 1.917038000  | 0.203563000  | -1.616144000 | H | -2.446079000 | -3.106458000 | -0.841595000 |
| C                             | 1.396782000  | -0.951374000 | -1.022737000 | H | -1.126828000 | -1.562457000 | 0.588600000  |
| C                             | 2.070711000  | -1.537167000 | 0.055394000  | H | 1.398262000  | 0.661451000  | -2.452475000 |
| C                             | 3.243908000  | -0.962272000 | 0.543330000  | H | 3.495778000  | 1.665193000  | -1.600199000 |
| H                             | 3.759653000  | -1.423106000 | 1.382604000  | C | -4.219648000 | -3.539015000 | 0.744232000  |
| H                             | 1.684025000  | -2.446362000 | 0.506576000  | H | -3.417288000 | -4.144439000 | 1.183901000  |
| Se                            | -0.191033000 | -1.777482000 | -1.753004000 | H | -4.531561000 | -4.036499000 | -0.195601000 |
|                               |              |              |              | H | 4.679615000  | 0.632529000  | 0.327297000  |
|                               |              |              |              | C | -5.439751000 | -3.503447000 | 1.684429000  |
|                               |              |              |              | H | -6.371696000 | -3.409200000 | 1.103830000  |
|                               |              |              |              | H | -5.502891000 | -4.437537000 | 2.250763000  |
|                               |              |              |              | C | -5.351704000 | -1.175651000 | 2.003585000  |
|                               |              |              |              | H | -6.380518000 | -0.778143000 | 1.979326000  |
|                               |              |              |              | H | -4.745334000 | -0.527298000 | 2.644509000  |
|                               |              |              |              | O | -5.338001000 | -2.459007000 | 2.635056000  |

## TSox

Energy= -9.66014791 Ha

nimag = -366.572 cm<sup>-1</sup>

|    |              |              |              |
|----|--------------|--------------|--------------|
| C  | 3.783534000  | 0.351761000  | -0.368024000 |
| C  | 2.911646000  | 0.786672000  | -1.366032000 |
| C  | 1.757203000  | 0.062189000  | -1.662519000 |
| C  | 1.484474000  | -1.102207000 | -0.942811000 |
| C  | 2.356956000  | -1.553827000 | 0.052195000  |
| C  | 3.506840000  | -0.818528000 | 0.339155000  |
| H  | 4.186953000  | -1.165706000 | 1.112954000  |
| H  | 2.148153000  | -2.470083000 | 0.597560000  |
| Se | -0.056080000 | -2.187986000 | -1.384606000 |
| C  | -1.519200000 | -1.416335000 | -0.175794000 |
| C  | -1.508876000 | 0.074035000  | -0.005816000 |
| C  | -1.923027000 | 0.961247000  | -1.011469000 |
| C  | -1.936857000 | 2.334222000  | -0.780689000 |
| C  | -1.539405000 | 2.851588000  | 0.452441000  |
| C  | -1.117707000 | 1.982075000  | 1.456533000  |
| C  | -1.100152000 | 0.608723000  | 1.224931000  |
| H  | -0.774174000 | -0.058653000 | 2.019360000  |
| H  | -0.804080000 | 2.370486000  | 2.422335000  |
| H  | -1.555699000 | 3.924429000  | 0.627751000  |
| H  | -2.255920000 | 3.004031000  | -1.575333000 |
| H  | -2.207881000 | 0.591042000  | -1.989237000 |
| C  | -2.825278000 | -2.053011000 | -0.698479000 |
| N  | -3.909868000 | -1.923621000 | 0.256052000  |
| C  | -5.239251000 | -1.841170000 | -0.327738000 |
| H  | -5.583236000 | -2.804541000 | -0.751673000 |
| H  | -5.224017000 | -1.126208000 | -1.155530000 |
| H  | -3.110231000 | -1.558890000 | -1.627039000 |
| H  | -2.630253000 | -3.113202000 | -0.955229000 |
| H  | -1.239288000 | -1.885958000 | 0.769333000  |
| H  | 1.080613000  | 0.387178000  | -2.445301000 |
| H  | 3.128359000  | 1.694589000  | -1.923251000 |
| C  | -3.856389000 | -2.861741000 | 1.381037000  |
| H  | -3.178151000 | -2.469825000 | 2.148708000  |
| H  | -3.468831000 | -3.852605000 | 1.072215000  |
| H  | 4.682359000  | 0.920968000  | -0.144823000 |
| C  | -5.251803000 | -3.063911000 | 1.991078000  |
| H  | -5.809951000 | -3.836578000 | 1.438433000  |
| H  | -5.157666000 | -3.408925000 | 3.025133000  |
| C  | -6.231912000 | -1.329343000 | 0.725577000  |
| H  | -7.258548000 | -1.582974000 | 0.414086000  |
| H  | -6.155274000 | -0.240680000 | 0.818487000  |
| O  | -5.979243000 | -1.850454000 | 2.035483000  |
| O  | -1.234819000 | -0.466695000 | -4.931990000 |
| O  | -0.795248000 | -1.218994000 | -3.111485000 |
| H  | -0.323023000 | -1.631717000 | -3.857850000 |
| H  | -2.109776000 | -0.880408000 | -4.974052000 |

## lox

Energy= -9.22942917 Ha

nimag = 0

|    |              |              |              |
|----|--------------|--------------|--------------|
| C  | 3.101068000  | -0.182863000 | -0.027576000 |
| C  | 2.460392000  | 0.099444000  | -1.234530000 |
| C  | 1.171378000  | -0.377470000 | -1.475208000 |
| C  | 0.534465000  | -1.130017000 | -0.494377000 |
| C  | 1.168320000  | -1.433866000 | 0.710159000  |
| C  | 2.456168000  | -0.950175000 | 0.943891000  |
| H  | 2.956947000  | -1.179393000 | 1.881469000  |
| H  | 0.677198000  | -2.043789000 | 1.465757000  |
| Se | -1.243746000 | -1.893817000 | -0.896896000 |
| C  | -2.397926000 | -0.563715000 | 0.246352000  |
| C  | -2.221793000 | 0.843251000  | -0.219197000 |
| C  | -2.783694000 | 1.304702000  | -1.422324000 |

|   |              |              |              |
|---|--------------|--------------|--------------|
| C | -2.627755000 | 2.631717000  | -1.816915000 |
| C | -1.911589000 | 3.527295000  | -1.023527000 |
| C | -1.344848000 | 3.082269000  | 0.170794000  |
| C | -1.494660000 | 1.755015000  | 0.563933000  |
| H | -1.049021000 | 1.422549000  | 1.498062000  |
| H | -0.785080000 | 3.770039000  | 0.800077000  |
| H | -1.795890000 | 4.563082000  | -1.332857000 |
| H | -3.066844000 | 2.966036000  | -2.753835000 |
| H | -3.329803000 | 0.621561000  | -2.062906000 |
| C | -3.858808000 | -1.081340000 | 0.255233000  |
| N | -4.190159000 | -1.885121000 | 1.425320000  |
| C | -5.579171000 | -1.785859000 | 1.849597000  |
| H | -6.276536000 | -2.309028000 | 1.166790000  |
| H | -5.880447000 | -0.734012000 | 1.854076000  |
| H | -4.098250000 | -1.602200000 | -0.690955000 |
| H | -4.500634000 | -0.197184000 | 0.279473000  |
| H | -1.973510000 | -0.694102000 | 1.244399000  |
| H | 0.658873000  | -0.178618000 | -2.412369000 |
| H | 2.965331000  | 0.691782000  | -1.993980000 |
| O | -1.527826000 | -1.496124000 | -2.478877000 |
| C | -3.758030000 | -3.285269000 | 1.359648000  |
| H | -2.690273000 | -3.342442000 | 1.600506000  |
| H | -3.887629000 | -3.711178000 | 0.346264000  |
| H | 4.106507000  | 0.188246000  | 0.154517000  |
| C | -4.557017000 | -4.152297000 | 2.348180000  |
| H | -5.479098000 | -4.528365000 | 1.876802000  |
| H | -3.964946000 | -5.023606000 | 2.643426000  |
| C | -5.714284000 | -2.329062000 | 3.281386000  |
| H | -6.763991000 | -2.610243000 | 3.469803000  |
| H | -5.425403000 | -1.561176000 | 4.007071000  |
| O | -4.855977000 | -3.444097000 | 3.537567000  |

## TSelim

Energy= -9.2134102 Ha

nimag = -607.658 cm<sup>-1</sup>

|    |              |              |              |
|----|--------------|--------------|--------------|
| C  | 3.035131000  | 0.667873000  | -3.239411000 |
| C  | 2.071530000  | -0.157099000 | -3.821433000 |
| C  | 1.232306000  | -0.935519000 | -0.325257000 |
| C  | 1.361637000  | -0.881337000 | -1.637088000 |
| C  | 2.325616000  | -0.059951000 | -1.044928000 |
| C  | 3.160157000  | 0.713332000  | -1.850199000 |
| H  | 3.908216000  | 1.353989000  | -1.389367000 |
| H  | 2.431959000  | -0.016411000 | 0.037004000  |
| Se | 0.263333000  | -1.989259000 | -0.482988000 |
| C  | -2.008227000 | -0.362765000 | -0.130901000 |
| C  | -1.551895000 | 0.992526000  | -0.382050000 |
| C  | -1.618238000 | 1.623945000  | -1.643260000 |
| C  | -1.211805000 | 2.942658000  | -1.806561000 |
| C  | -0.731156000 | 3.678796000  | -0.721912000 |
| C  | -0.654208000 | 3.074101000  | 0.534238000  |
| C  | -1.051453000 | 1.753304000  | 0.698721000  |
| H  | -0.986312000 | 1.293498000  | 1.682258000  |
| H  | -0.283905000 | 3.636005000  | 1.388330000  |
| H  | -0.420868000 | 4.712011000  | -0.854203000 |
| H  | -1.272910000 | 3.403394000  | -2.789543000 |
| H  | -1.992219000 | 1.080334000  | -2.504272000 |
| C  | -2.782456000 | -1.198616000 | -0.996851000 |
| N  | -3.759339000 | -2.044357000 | -0.350641000 |
| C  | -4.919348000 | -1.356069000 | 0.203623000  |
| H  | -5.606274000 | -0.992100000 | -0.585642000 |
| H  | -4.591191000 | -0.473564000 | 0.758297000  |
| H  | -3.139175000 | -0.720237000 | -1.924373000 |
| H  | -1.916764000 | -1.992534000 | -1.426421000 |
| H  | -1.988269000 | -0.670228000 | 0.911552000  |
| H  | 0.487807000  | -1.588007000 | -3.471134000 |
| H  | 1.973690000  | -0.199937000 | -4.903840000 |

|   |              |              |              |
|---|--------------|--------------|--------------|
| O | -0.792214000 | -2.784696000 | -1.567850000 |
| C | -4.169702000 | -3.192201000 | -1.167955000 |
| H | -3.377865000 | -3.945984000 | -1.124167000 |
| H | -4.301839000 | -2.914582000 | -2.232194000 |
| H | 3.687946000  | 1.270815000  | -3.865243000 |
| C | -5.501108000 | -3.773091000 | -0.659617000 |
| H | -6.355806000 | -3.285136000 | -1.155714000 |
| H | -5.555954000 | -4.840324000 | -0.893885000 |
| C | -5.653693000 | -2.299172000 | 1.169885000  |
| H | -6.699461000 | -1.965845000 | 1.284529000  |
| H | -5.175932000 | -2.281836000 | 2.155687000  |
| O | -5.617353000 | -3.664312000 | 0.749556000  |

#### SeOH

Energy= -3.0044793 Ha  
nimag = 0

|    |              |              |              |
|----|--------------|--------------|--------------|
| Se | -0.229018000 | 1.753446000  | 0.064112000  |
| C  | -1.666618000 | 0.470224000  | 0.042457000  |
| C  | -2.974497000 | 0.948980000  | -0.100560000 |
| C  | -4.038711000 | 0.051509000  | -0.198858000 |
| C  | -3.808511000 | -1.320855000 | -0.116205000 |
| C  | -2.505574000 | -1.796860000 | 0.047901000  |
| C  | -1.434347000 | -0.908971000 | 0.108841000  |
| H  | -3.162713000 | 2.018903000  | -0.122957000 |
| H  | -5.051255000 | 0.430170000  | -0.316024000 |
| H  | -4.639913000 | -2.018545000 | -0.175312000 |
| H  | -2.320356000 | -2.866534000 | 0.111672000  |
| H  | -0.422480000 | -1.290547000 | 0.208833000  |
| O  | 0.664358000  | 1.259933000  | 1.594612000  |
| H  | 1.391704000  | 0.698247000  | 1.292068000  |

#### En

Energy= -6.17730343 Ha  
nimag = 0

|   |              |              |              |
|---|--------------|--------------|--------------|
| C | -1.278426000 | -0.047094000 | 0.699708000  |
| C | -1.118337000 | 1.278360000  | -0.045748000 |
| C | -0.062136000 | 1.467118000  | -0.943876000 |
| C | 0.080396000  | 2.682196000  | -1.610835000 |
| C | -0.833985000 | 3.713048000  | -1.393040000 |
| C | -1.891620000 | 3.528130000  | -0.503291000 |
| C | -2.038761000 | 2.313462000  | 0.163709000  |
| H | -2.860811000 | 2.188353000  | 0.864882000  |
| H | -2.601123000 | 4.330995000  | -0.323373000 |
| H | -0.718620000 | 4.660907000  | -1.911299000 |
| H | 0.912950000  | 2.825904000  | -2.293892000 |
| H | 0.665530000  | 0.676277000  | -1.110193000 |
| C | -2.292252000 | -0.854000000 | -0.020954000 |
| N | -3.418962000 | -1.323774000 | 0.408576000  |
| C | -3.911331000 | -1.286986000 | 1.793732000  |
| H | -4.902211000 | -0.825369000 | 1.759991000  |
| H | -3.271294000 | -0.671782000 | 2.420979000  |
| H | -2.091311000 | -1.040658000 | -1.075424000 |
| H | -1.515427000 | 0.112233000  | 1.751696000  |
| C | -4.341102000 | -2.059447000 | -0.499573000 |
| H | -3.744058000 | -2.468594000 | -1.315648000 |
| H | -5.060412000 | -1.340097000 | -0.908584000 |
| C | -5.054456000 | -3.178552000 | 0.290282000  |
| H | -6.001055000 | -2.822568000 | 0.721032000  |
| H | -5.285637000 | -4.004015000 | -0.386982000 |
| C | -3.986347000 | -2.740475000 | 2.331560000  |
| H | -4.795570000 | -2.790056000 | 3.075176000  |
| H | -3.046888000 | -3.021010000 | 2.815549000  |
| O | -4.185701000 | -3.681583000 | 1.287291000  |
| H | -0.333754000 | -0.604725000 | 0.655401000  |

#### TS1

Energy= -6.630218 Ha  
nimag = -1248.841

|   |              |              |              |
|---|--------------|--------------|--------------|
| C | -2.410395000 | 0.597507000  | 0.869768000  |
| C | -1.608853000 | 1.673063000  | 0.160966000  |
| C | -0.222448000 | 1.756280000  | 0.334986000  |
| C | 0.514478000  | 2.740417000  | -0.323398000 |
| C | -0.125860000 | 3.651437000  | -1.161947000 |
| C | -1.507995000 | 3.580581000  | -1.335004000 |
| C | -2.245343000 | 2.598342000  | -0.676267000 |
| H | -3.326089000 | 2.572264000  | -0.803031000 |
| H | -2.015853000 | 4.298325000  | -1.973368000 |
| H | 0.447863000  | 4.421853000  | -1.669571000 |
| H | 1.588850000  | 2.799561000  | -0.172123000 |
| H | 0.288012000  | 1.062056000  | 0.998400000  |
| C | -2.715613000 | -0.581383000 | -0.024680000 |
| N | -3.457000000 | -1.754237000 | 0.435142000  |
| C | -3.667643000 | -1.987365000 | 1.883565000  |
| H | -4.506106000 | -1.378064000 | 2.238456000  |
| H | -2.779320000 | -1.693219000 | 2.443014000  |
| H | -3.080343000 | -0.273961000 | -1.005348000 |
| H | -3.383971000 | 0.997038000  | 1.183341000  |
| C | -4.685535000 | -2.069869000 | -0.352592000 |
| H | -4.374959000 | -2.315020000 | -1.372327000 |
| H | -5.347798000 | -1.195242000 | -0.389070000 |
| C | -5.414051000 | -3.265118000 | 0.298396000  |
| H | -6.180495000 | -2.918524000 | 1.006661000  |
| H | -5.916106000 | -3.853664000 | -0.473133000 |
| C | -3.929237000 | -3.497992000 | 2.092336000  |
| H | -4.596512000 | -3.626108000 | 2.957506000  |
| H | -2.995207000 | -4.029430000 | 2.295596000  |
| O | -4.477331000 | -4.114093000 | 0.932455000  |
| O | -1.408095000 | -1.412507000 | -0.301985000 |
| H | -1.089316000 | -1.350323000 | -1.221734000 |
| H | -2.161721000 | -2.228564000 | -0.073446000 |
| H | -1.896585000 | 0.265953000  | 1.774772000  |

#### I

Energy= -7.21586 Ha  
nimag = 0

|   |              |              |              |
|---|--------------|--------------|--------------|
| C | -1.689773560 | -0.176055253 | 0.274698973  |
| C | -1.180583954 | 1.176479459  | -0.184466198 |
| C | -0.712008357 | 1.360703468  | -1.490331173 |
| C | -0.250388622 | 2.608541965  | -1.907067418 |
| C | -0.252506077 | 3.688421011  | -1.024974942 |
| C | -0.713723660 | 3.514091730  | 0.279425234  |
| C | -1.173343778 | 2.265825510  | 0.696121812  |
| H | -1.509014845 | 2.141263962  | 1.724103570  |
| H | -0.704224229 | 4.346314430  | 0.978170216  |
| H | 0.114723481  | 4.658570290  | -1.348466635 |
| H | 0.119661421  | 2.733820677  | -2.921199083 |
| H | -0.698783278 | 0.525618374  | -2.185680151 |
| C | -3.206757784 | -0.300694525 | 0.076308928  |
| N | -3.755938768 | -1.513489246 | 0.958182156  |
| C | -5.244554043 | -1.429640889 | 1.191154242  |
| H | -5.718072891 | -1.207659483 | 0.233513102  |
| H | -5.408598423 | -0.592162728 | 1.872608066  |
| H | -3.718969584 | 0.559404075  | 0.522573948  |
| H | -1.445473909 | -0.307814062 | 1.335989833  |
| C | -3.396333218 | -2.884305477 | 0.458377719  |
| H | -2.337805748 | -2.904736757 | 0.202419400  |
| H | -3.970327854 | -3.045510769 | -0.453078449 |
| C | -3.719660521 | -3.908942461 | 1.570142150  |

|   |              |              |              |
|---|--------------|--------------|--------------|
| H | -4.061223507 | -4.845477104 | 1.106461644  |
| H | -2.834641933 | -4.126077175 | 2.174508810  |
| C | -5.750415802 | -2.761210442 | 1.788969636  |
| H | -6.164986134 | -3.413929701 | 1.008143544  |
| H | -6.539491653 | -2.563762188 | 2.517989397  |
| O | -4.691576481 | -3.403698444 | 2.481308460  |
| O | -3.556439400 | -0.514937639 | -1.227605581 |
| H | -4.285437584 | 0.084510349  | -1.500755310 |
| H | -3.316471815 | -1.410571933 | 1.875450134  |
| H | -1.189132690 | -0.970779896 | -0.284725159 |
| O | -5.622590065 | 1.209880590  | -1.987871528 |
| H | -6.194293976 | 0.949854434  | -2.722903490 |
| H | -5.375879288 | 2.123489857  | -2.187005281 |

Phenylacetaldehyde  
Energy= -3.81886467 Ha  
nimag = 0

|   |              |             |              |
|---|--------------|-------------|--------------|
| C | -0.919900000 | 2.350100000 | 0.979500000  |
| C | -0.152300000 | 3.023500000 | -0.146400000 |
| C | 0.468900000  | 2.245000000 | -1.131500000 |
| C | 1.167100000  | 2.849200000 | -2.175500000 |
| C | 1.245400000  | 4.239400000 | -2.253800000 |
| C | 0.625200000  | 5.022100000 | -1.280800000 |
| C | -0.070600000 | 4.417900000 | -0.234400000 |
| H | -0.536900000 | 5.039800000 | 0.526300000  |
| H | 0.689600000  | 6.105800000 | -1.329400000 |
| H | 1.792800000  | 4.710400000 | -3.065800000 |

|   |              |             |              |
|---|--------------|-------------|--------------|
| H | 1.654500000  | 2.232400000 | -2.926100000 |
| H | 0.421200000  | 1.159800000 | -1.076300000 |
| C | -2.313300000 | 2.001200000 | 0.535700000  |
| H | -2.905300000 | 2.846700000 | 0.124300000  |
| H | -1.021000000 | 3.047100000 | 1.823200000  |
| O | -2.799300000 | 0.879800000 | 0.584200000  |
| H | -0.420000000 | 1.447300000 | 1.340000000  |

Morpholine  
Energy= -2.85890334 Ha  
nimag = 0

|   |              |              |              |
|---|--------------|--------------|--------------|
| N | -3.771121000 | -2.184624000 | 0.602577000  |
| C | -3.434790000 | -3.044042000 | 1.796643000  |
| H | -3.483803000 | -2.391797000 | 2.670587000  |
| H | -2.409051000 | -3.400768000 | 1.681545000  |
| C | -5.140021000 | -1.543740000 | 0.727921000  |
| H | -5.416932000 | -1.202733000 | -0.271917000 |
| H | -5.037411000 | -0.678066000 | 1.386294000  |
| C | -6.110988000 | -2.612231000 | 1.284658000  |
| H | -6.277452000 | -2.471621000 | 2.360846000  |
| H | -7.074552000 | -2.541474000 | 0.776293000  |
| C | -4.465368000 | -4.200918000 | 1.837224000  |
| H | -4.771474000 | -4.381194000 | 2.876485000  |
| H | -4.036485000 | -5.121469000 | 1.434384000  |
| O | -5.586439000 | -3.904311000 | 1.010776000  |
| H | -3.774704000 | -2.779152000 | -0.230980000 |
| H | -3.057621000 | -1.466617000 | 0.460865000  |
